# Supplementary material for: Space and ground segment performance and lessons learned of the FORMOSAT-3/COSMIC mission: four years in orbit
Source: Copernicus journal article supplement (doi:10.5194/amt-4-1115-2011), 2011-06-17
Supplement: Supplementary file 1 [file amt-4-1115-2011-supplement.pdf]

# 1 **Space and Ground Segment Performance and Lessons**

## 2 **Learned of the FORMOSAT-3/COSMIC Mission: Four Years**

### 3 **in Orbit**

4

5 **GhenC.-Joe J. Fong<sup>1</sup>, Doug D. Whiteley<sup>2</sup>, Eddy E. Yang<sup>1</sup>, Kendra K. Cook<sup>3</sup>, Vicky**

6 V. Chu<sup>1</sup>, Bill B. Schreiner<sup>4</sup>, Dave D. Ector<sup>2</sup>, Peter P. Wilczynski<sup>2</sup>, Tie T.-Yue Y.

7 Liu<sup>1</sup>, and Nick N. Yen<sup>1</sup>

8 <sup>1</sup>{National Space Organization (NSPO), HsinChu, Taiwan}

9 <sup>2</sup>{National Oceanic and Atmospheric Administration (NOAA), Silver Spring, MD, USA}

10 <sup>3</sup>{C<sup>2</sup> International, LLC, DullesKimball, SDVA, USA}

11 <sup>4</sup>{University Corporation for Atmospheric Research (UCAR), Boulder, CO, USA}

12 Correspondence to: Kendra K. Cook (kcook@c2iconsulting.com)

13

#### 14 **Abstract**

15 The FORMOSAT-3/COSMIC (Constellation Observing System for Meteorology, Ionosphere,

16 and Climate) Mission consisting of six Low-Earth-Orbit (LEO) satellites is the world's first

17 demonstration constellation using radio occultation signals from Global Positioning System

18 (GPS) satellites. The atmospheric profiles derived by processing radio occultation signals are

19 retrieved in near real-time for global weather/climate monitoring, numerical weather

20 prediction, and space weather research. The mission has processed, on average, 1,400 to 1,800

21 high-quality atmospheric sounding profiles per day. The atmospheric radio occultation

22 soundings data are assimilated into operational numerical weather prediction models for

23 global weather prediction, including typhoon/hurricane/cyclone forecasts. The radio

24 occultation data has shown a positive impact on weather predictions at many national weather

25 forecast centers. A proposed follow-on mission was proposed that transitions the program

26 from the current experimental research system mission in to a significantly improved real-time

27 operational system mission, which will reliably provide 8,000 radio occultation soundings per

28 day. The follow-on mission, as planned, will consist of 12 LEO satellites (compared to 6

1 [satellites for the current mission](#)) with a data latency [requirement](#) of 45 minutes ([compared to](#)  
2 [23 hours for the current mission](#)), which will provide greatly enhanced opportunities for  
3 operational forecasts and scientific research. This paper will address the FORMOSAT-  
4 43/COSMIC [system and mission](#) overview, the spacecraft and ground system  
5 performance after four years in orbit, the lessons learned from the encountered technical  
6 challenges and observations, and the expected design improvements for the [new](#)-spacecraft  
7 and ground system [for FORMOSAT-7/COSMIC-2](#).

## 81 Introduction

9 The FORMOSAT-3/COSMIC (Constellation Observing System for Meteorology, Ionosphere,  
10 and Climate) (FS-3/C) [Mission](#) is a joint Taiwan-U.S. demonstration satellite mission that  
11 was launched in April 2006. The objective of FS-3/C is to demonstrate the value of near-real-  
12 time GPS Radio Occultation (GPS-RO) observations in operational numerical weather  
13 prediction. FS-3/C is currently providing global GPS-RO data in near-real-time to over 1,400  
14 users in more than 52 countries. The GPS-RO data has been demonstrated to be a valuable  
15 asset to the climate, meteorology, and space weather communities. The GPS/Meteorology  
16 (GPS/MET) experiment (1995-1997) showed that the GNSS-RO technique offers great  
17 advantages over the traditional passive microwave measurement of the atmosphere by  
18 satellites and became the first space-based “proof-of-concept” demonstration of GNSS-RO  
19 [mission impacts to Earth’s observation](#) (Ware et al., 1996; Kursinski et al., 1996; Rius et al.,  
20 1998; Anthes et al., 2000; Hajj et al., 2000; Kuo et al., 2000). For a more complete history of  
21 GNSS-RO see Yunck et al. (2000) and Melbourne et al. (2005). The extraordinary success of  
22 the GPS/MET mission inspired a series of other RO missions, e.g., the Ørsted (in 1999), the  
23 SUNSAT (in 1999), the Satellite de Aplicaciones Cientificas-C (SAC-C) (in 2001), the  
24 Challenging Minisatellite Payload (CHAMP) (in 2001), and the twin Global GNSS Radio  
25 Occultation Mission for Meteorology, Ionosphere & Climate Gravity Recovery and Climate  
26 Experiment (GRACE) missions (in 2002), [the Europe's meteorology operational satellite](#)  
27 [series A \(MetOp-A\) \(in 2006\) \(Luntama et al., 2008\), and the Oceansat-2 \(in 2009\) \(Perona et](#)  
28 [al., 2007\).](#)

29 [The FS-3/C mission uses single differencing processing to extract excess atmospheric phases](#)  
30 [for each occultation event because it is less susceptible to GPS ground station tracking errors](#)  
31 [\(Schreiner et al. 2009\)](#). FS-3/C has proven to increase the accuracy of the predictions of  
32 hurricane/typhoon/cyclone behavior, significantly improve long-range weather forecasts, and

1 monitor climate change with unprecedented accuracy (Anthes et al., 2000; Anthes et al., 2008;  
2 Kuo et al., 2000, Kuo et al., 2004, Kuo et al., 2008; [Liou et al., 2007](#)). -The success of the  
3 FS-3/C mission has initiated a new era for near real-time operational [exploitation of](#) global  
4 navigation satellite system (GNSS) RO soundings (Yunck et al., 2000).

5 However, the [FS-3/C](#) mission will reach the end of its five-year design life in 2011, and the  
6 critical real-time satellite observing capability will begin to degrade as satellites become no  
7 longer operational. As a result, the National Space Organization (NSPO) and National  
8 Oceanic and Atmospheric Administration (NOAA) intend to jointly develop the  
9 FORMOSAT-7/COSMIC-2 (FS-7/C-2) mission. FS-7/C-2 will incorporate the next  
10 generation GNSS-RO receiver, a [significantly improved spacecraft design](#)  
11 ~~improved and new developed spacecraft design~~, and a [greater](#)  
12 ~~more substantial~~ ground [communication](#) network for data download ~~as a follow-on constellation mission to FS-~~  
13 ~~3/C~~ (Chu et al., 2008; Fong et al., 2008c; Fong et al., 2009a; Fong et al., 2009b).

14 FS-7/C-2 is intended to provide continuity of [the](#) GPS-RO data as well as provide the next  
15 generation of GNSS-RO data [to the scientific community and the global weather centers](#)  
16 The objective of the FS-7/C-2 [M](#)mission is to collect a large amount of atmospheric and  
17 ionospheric data primarily for operational weather forecasting and space weather monitoring  
18 as well as meteorological, climate, ionospheric, and geodetic research. In addition, the system  
19 will allow scientists to collect data over unpopulated and remote regions (such as the polar  
20 and oceanic regions) in support of research in these areas. This paper will address the [system](#)  
21 ~~and FS-3/C~~ [system and mission](#) overview, the spacecraft and ground system performance  
22 after four year in orbit, the lessons ~~we have~~ learned from the encountered technical challenges  
23 and observations, and the expected design improvements for the new [FS-7/C-2](#) spacecraft and  
24 ground system.

25

## 26 **2 FS-3/C System and Mission Overview**

27 The FS-3/C space segment ~~is comprised of~~ [includes](#) six Low-Earth-Orbit (LEO) satellites in a  
28 constellation-like formation. The FS-3/C satellite constellation was successfully launched  
29 into the same orbital [al](#) plane at 516 km altitude at 01:40 UTC on 15 April 2006. The FS-3/C  
30 satellites are equipped with three onboard payloads including a GPS Occultation Receiver  
31 (GOX), a Tri-Band Beacon (TBB), and a Tiny Ionospheric Photometer (TIP). The ~~intended~~  
32 satellite constellation was ~~planned~~ [intended](#) to ~~have~~ [include](#) six orbit planes at 800 km final

1 mission altitude with 30 degree separation for evenly distributed global coverage. ~~One of the~~  
2 ~~six satellites, designated as FM3, was not able to maneuver to the 800 km final orbit due to a~~  
3 ~~solar array drive mechanism problem during the orbit raising phase that prohibited the~~  
4 ~~continuous thrust firing of the FM3. Therefore, FM3 was maintained at an orbit altitude of~~  
5 ~~5711 km. The other five FS-3/C satellites (all except FM3) reached their final mission orbit~~  
6 ~~altitude of 800 km by the end of November 2007 (Fong et al., 2008b).~~

7 The FS-3/C system that is in operation today consists of ~~the~~ six satellites, a Satellite  
8 Operations Control Center (SOCC) in Taiwan, four remote tracking stations (RTSs), two local  
9 tracking stations (LTSs), two data processing centers, and a fiducial network. The SOCC  
10 uses the real-time telemetry and the back orbit telemetry to monitor, control, and manage the  
11 spacecraft state-of-health. There are two LTSs: one located in Chungli, Taiwan and the other  
12 in Tainan, Taiwan. There are four RTSs operated by NOAA to support the satellite passes:  
13 Fairbanks Command and Data Acquisition Station (FCDAS) in Fairbanks, Alaska and  
14 Kongsberg Satellite Services Ground Station (KSAT) in Tromsø, Norway, which are  
15 currently ~~set as~~ the two primary stations for the mission. ~~T~~, ~~and~~ the Wallops station in  
16 Virginia, ~~USA~~ and the McMurdo station in McMurdo, Antarctica, ~~which~~ provide backup  
17 support as needed for the mission (Fong et al., 2008c; Fong et al., 2009a; Fong et al., 2009b).

18 The science RO data is downlinked from the satellites to the RTS and then transmitted from  
19 the RTS via NOAA to the two data processing centers. The two data processing centers are  
20 the CDAAC (COSMIC Data Analysis and Archive Center) located in Boulder, Colorado,  
21 ~~USA~~, and the TACC (Taiwan Analysis Center for COSMIC) located at the Central Weather  
22 Bureau (CWB) in Taiwan. The fiducial GNSS data is combined with the occulted and  
23 referenced GNSS data from the GOX payload to remove the satellite clock errors.

24 The science data collected by the GOX and TIP payloads ~~science data~~ are processed by the  
25 CDAAC and TACC. The results processed by the CDAAC are then passed to the National  
26 Environmental Satellite, Data, and Information Service (NESDIS) at NOAA. These data are  
27 further routed to the international weather centers including the Joint Center for Satellite Data  
28 Assimilation (JSCDA), National Centers for Environment Prediction (NCEP), European  
29 Centre for Medium-range Weather Forecast (ECMWF), United Kingdom Meteorological  
30 Office (UKMO), Japan Meteorological Agency (JMA), Air Force Weather Agency (AFWA),  
31 Canadian Meteorological Centre (Canada Met), French National Meteorological Service  
32 (Météo France), and Taiwan's CWB, ~~ete~~. The data are provided to the global weather centers

1 within ~~the~~ 180 minutes to meet the data latency ~~requirement in order~~ limit required to be  
2 assimilated into the numerical weather prediction (NWP) models.

3

## 43 **Spacecraft Performance after Four Years in Orbit**

### 53.1 **Spacecraft Constellation Performance**

6 The FS-3/C in-orbit system performance over the last four years is considered to be more than  
7 satisfactory in meeting its mission goals. The experimental constellation was ~~intended~~ defined  
8 to ~~have be~~ a two-year ~~experimental~~ spacecraft mission life, and ~~thea~~ with a five-year  
9 spacecraft design life is of five years. The spacecraft hardware failure and/or degradation are  
10 proceeding as anticipated. Although the expectation of the entire 6-satellite constellation  
11 continuing operations into the fifth year and beyond is not realistic, a partial constellation  
12 with degraded performance is likely to continue for a few more years. ~~It is~~ In addition, the  
13 ~~authors~~ believed that the lessons learned from the in-orbit operations will provide a solid  
14 foundation to migrate the experimental system into a ~~realistically~~ stable and reliable  
15 operational system for follow-on missions.

16 The operation status of the key subsystems for all six satellites after four years in orbit is  
17 shown in Table 1. The battery power issue is a common and continuous major degradation  
18 problem for all spacecraft. For clarity, the satellites will be referred to as “FMx” where x is  
19 1:6. FM4 and FM6 are experiencing significant battery degradations that are causing the  
20 payloads to be powered off unexpectedly, even at high battery state-of-charge. In addition,  
21 FM2 experienced a sudden significant solar panel power shortage in mid-November 2007.  
22 Since then, the output power of FM2 was reduced to one-half of the maximum solar array  
23 power capability, from 200 W to 100 W. The root cause of the FM2 power shortage is still  
24 undetermined. FM3 encountered ~~the a~~ solar array drive mechanism failure at 711 km orbit  
25 that ~~prohibited the continuous~~ led to the inhibited propellant thrust firing of the FM3. The  
26 other five FS-3/C satellites reached their final mission orbit altitude of 800 km by the end of  
27 November 2007 (Fong et al., 2008b). FM3 for the continuous orbit raising and tracking ~~inged~~ the  
28 solar power at reduced duty cycle depending on the power status of the spacecraft. The  
29 secondary payloads, TIP and TBB, on FM2 and FM3, as shown in Table 1, have been  
30 powered off due to the power shortage issues. Furthermore, FM3 has been in a severe  
31 abnormal condition (much more frequent loss of communication and low power status) since  
32 July 2010 (Fong et al., 2010).

1Figure 1 shows the spacecraft system performance observed over the past four years (since  
2launch) for the GOX mission payload ~~with the GOX payload~~ duty cycle on, and spacecraft  
3ADCS (Attitude Determination and Control Subsystem) attitude performance vs. spacecraft  
4sun beta angle. The sun beta angle is defined as the angle between the spacecraft orbital plane  
5and the vector from the sun. It that determines the percentage of time the spacecraft in low  
6Earth orbit spends in direct sunlight, absorbing solar energy. The GOX payload should be on  
7during the normal operation period except during the constellation deployment phase.

8In Figure 1, it is observed that all spacecraft continue to operate with the GOX payload duty  
9cycle on at high percentage rates even as the spacecraft bus and payload start to show  
10degradation. FM1 has provided good payload performance, however it shows worse attitude  
11performance than the other spacecraft. FM2 started to show reduced GOX payload duty-  
12cycle ~~GOX~~ on operations due to a battery charging efficiency-decreased phenomena that was  
13experienced after the satellite was recovered from lost communication in June 2009. FM3  
14encountered malfunctions of the solar array drive mechanism ~~malfunctions~~ starting in August  
152007 when it reached a 711 km orbit. FM3 has been kept at that altitude and the GOX  
16payload has been operating at low duty cycle since then. FM4 performed very well during the  
17four year operational period, but recently its battery has shown significant degradation. FM5  
18has provided good spacecraft performance, however its GOX payload shows low SNR  
19problems; ~~causing resulting in difficulties generating good useful data to be hard to generate~~  
20even when the GOX payload is on. FM6 has a similar GOX payload low SNR problem. In  
21September 2007, FM6 experienced loss of communications ~~in September 2007~~ for 67 days.  
22The satellite resumed contact and recovered on its own after a computer master reset event  
23occurred over the South Atlantic Anomaly (SAA) region. In summary, d~~Due to a the~~  
24batteriesy aging ~~issue~~, four out of the six spacecraft have begun to encounter a battery  
25degradation problem. FM4 and FM6 are worse than the other four spacecraft. The major on-  
26orbit performance highlights for all spacecraft are summarized in Table 2.

### 273.2 GOX Mission Payload Performance

28Figure 2 shows the four-year statistics for the number of daily occultation events for (a)  
29atmosphere profiles ~~for the four years since launch~~ and (b) ionosphere profiles of electron  
30density ~~for the four years since launch~~. The ~~contributed~~ atmosphere and ionosphere  
31occultation profiles ~~contributed by from~~ each spacecraft are shown in Table 3.

1The GOX payload performance summaries are shown in Table 4. As the primary mission  
2payload, four GOX payloadinstruments are being operated at a duty cycle of 100% and two  
3other GOX payloadsinstruments (onboard FM2 and FM3) are being operated based on the  
4state of the power charge at various sun beta angles (due to the power shortages). ~~The beta~~  
5~~angle is defined as the angle between the spacecraft orbit plane and the vector from the sun~~  
6~~that determines the percentage of time the spacecraft in low Earth orbit spends in direct~~  
7~~sunlight, absorbing solar energy.~~ There are many factors that affect the quality of the  
8occultation data received from the GPS signals. Among them, the low SNR on the  
9occultating precision orbit determination (POD) antenna seems to affect the data quality the  
10most. Four spacecraft (FM1, FM3, FM5, and FM6) have exhibited a low SNR anomaly on  
11the POD1 antenna for the GOX payload. FM2 exhibited a low SNR anomaly on POD2.

12In February 2009, the FM6 GOX payload SNR decreased, ~~however, to where~~ the GOX  
13payload operating temperature was not over ~~its the~~ red high limit (the limit that will shut  
14down the GOX payload power ~~by the autonomously) control system~~. The RO profiles  
15decreased to less than 100 per day and FM6 could only generate good RO data while the  
16operating temperature was less than 25 °C. After two months of low RO data generation, the  
17spacecraft was flip-flopped and the FM6 GOX payload recovered on its own and began to  
18operate ~~in at~~ full duty cycle.

19~~The RO data generation is dependant on the duty cycles of the power-on condition. More~~  
20~~details regarding the GOX payload on and off performance will be discussed in the next sub-~~  
21~~section. In order to assess the GOX payload instrument performance, all of the other payloads~~  
22~~were powered off for the GOX software revision upload, and there are only few events on~~  
23~~some spacecraft when the GOX payload instruments were powered off for trouble shooting.~~  
24~~The GOX payload instrument itself on all six spacecraft has performed reliably over the past~~  
25~~four years.~~

### 263.3 Spacecraft Payload On/Off Performance

27The causes of the GOX payload being powered off are categorized as follows: nadir mode  
28due to attitude excursion; stabilized mode after thrust burns; processor reboot/resets; entrance  
29to stabilized/safehold mode; power shortage; derivative of battery molecular to charge  
30(dMdC) anomaly; nadir mode after thrust burns such that spacecraft enters into power  
31contingency; and Power Control Module (PCM) Direct Current (DC) Off anomaly. From the  
32GOX payload duty cycle on values shown in Figure 1, it is possible to compile the GOX

1 payload duty cycle on statistics for one to four years, which are shown in Figure 3. It is  
2 observed that the FM2 & FM3 power shortages are the main cause of the degraded average  
3 GOX duty cycles annually on those spacecraft. After the completion of the orbit transfer,  
4 FM4 and FM5 are demonstrating the best GOX payload performance. The drop in FM6  
5 GOX payload duty cycles in the second year is due to the complete loss of communications  
6 for 67 days. Additionally, the low SNR issue makes FM6 the 4th best performing satellite  
7 among the 6 satellites, following FM4, FM1, and FM5 for GOX payload performance.

### 83.4 Spacecraft Ni-H2 Battery Performance

9 There is another payload off phenomenon that did not belong to any category listed in the  
10 previous sub-section that is relevant to the battery performance degradation issue. Beginning  
11 in April 2009, the operations team has observed the GOX payload unexpectedly turn off  
12 while the spacecraft has in good power and attitude conditions, where the battery state-of-  
13 charge (SOC) indicated is higher than the design value of 5.5 ampere-hours, and the  
14 spacecraft is operating nominally at the Nadir-Yaw mode. This phenomenon is beginning to  
15 be a frequently recurring event on all six spacecraft. According to the spacecraft design, the  
16 payload will be turned off only when any of the following design conditions are met: (1) the  
17 external payload off ground command is sent; (2) the low power spacecraft battery SOC falls  
18 below 5.5 ampere-hours; (3) three flight computers (Attitude Control Electronics (ACE),  
19 Battery Control Regulator (BCR), or Flight Computer (FC)) have been rebooted or reset; or  
20 (4) the spacecraft attitude has entered into stabilize / safehold / thrust mode.

21 The battery performance degradation issue has become one of the major triggers of the  
22 unexpected payload off phenomenon. The unexpected payload off is categorized as a  
23 deviation from the normal payload off that are initiated by either (1) by the ground  
24 command or (2) autonomous internal command due to insufficient solar power charge to the  
25 battery. The S-band transmitter is turned on and needs to draw a substantial amount of power  
26 and current with a higher demand priority from the bus during a ground Telemetry Tracking  
27 and Control (TT&C) passes. This lowers the bus voltage further if the battery cannot provide  
28 sufficient power in time. Consequently, the battery degradation effect may cause the payload  
29 to be turned off sometimes during a ground TT&C pass. The battery degradation, as  
30 observed, has shown to cause the bus voltage to be lower than 11 Vvolts (compared to the  
31 nominal 14 Vvolts), but slightly higher than 10 Vvolts. Since the input voltage requirement  
32 for the tank pressure transducer is above 11 Vvolts, the pressure transducer reading will



1 decrease dramatically and become unreliable to reflect the low bus voltage status when the  
2 actual bus voltage falls below 11 ~~V~~volts. In addition, when the value of bus voltage is below  
3 the Power Control Module (PCM) design value of 10 ~~V~~volts, the payload will be turned off  
4 by the PCM internal command due to the internal under voltage protection circuit design  
5 (Fong et al., 2010).

6 Table 5 shows the average variation rate per year of the battery for each spacecraft. FM4 and  
7 FM6 have shown the worst battery degradation. The spacecraft battery degradation ~~certainly~~  
8 ~~has~~ significantly impacts ~~on~~ the spacecraft operational life and the total number of GOX  
9 payload occultation profiles.

10

## 114 Ground System Performance

### 124.1 NSPO Ground Systems

13 NSPO was in charge of the mission operations of FS-3/C after launch including the early orbit  
14 checkout and initialization, constellation orbit deployment, and normal and contingent  
15 satellite operations. The facility used for the mission operations is the ~~Satellite Operation~~  
16 ~~Control Center~~ (SOCC) located in Hsin-Chu, Taiwan. The SOCC includes four subsystems:  
17 (1) Mission Operation subsystem for the real-time satellite operations during ~~a~~ station contact;  
18 (2) Flight Dynamics ~~Facility~~ ~~Facility~~ for the orbit determination, prediction and maneuver  
19 planning; (3) Science Control subsystem for the science data preprocessing; and (4) Mission  
20 Control subsystem for the operation planning and command scheduling. NSPO also provides  
21 two ~~Telemetry Tracking and Control~~ (TT&C) stations, (~~or~~ typically called ~~G~~ground  
22 ~~S~~stations), in Taiwan to support the contingent operations of FS-3/C.

23 In the early orbit checkout phase, the SOCC successfully sent commands to FS-3/C for  
24 spacecraft State of Health (SOH) inspection and hardware/software initialization. The  
25 measured performance of the in-orbit spacecraft compared to the expected results from the  
26 relevant ground tests ~~will~~ show the SOH of a spacecraft in orbit. Some components, such as the  
27 GPS receiver and the battery charging parameters, were reconfigured for improved  
28 performance. In the constellation orbit deployment phase, the six FS-3/C satellites were  
29 maneuvered into the mission orbit altitude one by one in a planned time sequence. Each  
30 satellite took 4-6 weeks to maneuver into its mission orbit. The satellite constellation was  
31 fully deployed in 19 months. After the deployment, five of the six satellites had successfully

1reached the predefined mission orbits (except the FM3 whose onboard propulsion function  
2was degraded which prohibited it from reaching its final mission orbit altitude). As mentioned  
3previously, FM3 stayed in a lower orbit altitude of 711 km, which is 89 km lower than the  
4other five satellite orbits of 800 km.

5In the normal operations phase, the SOCC routinely uplinked the time-tagged command loads  
6to the satellites so that for each scheduled station contact, the satellites would sequentially  
7turn on their transmitter, downlink payload data, downlink SOH data and then turn off their  
8transmitter. On average, there are approximately 80 station contacts per day to dump the  
9onboard payload data for near real-time meteorological research and operational applications.  
10During normal operations some satellite anomalies also occurred, such as FC computer resets,  
11BCR computer resets, ACE computer resets, Master resets and Phoenix resets. Phoenix is an  
12off state of the satellite when satellite is out of battery power and is used to support satellite  
13recovery when power condition is back to stable. Each type of reset was recovered by sending  
14a series of configuration commands so that both the satellite and payload could resume  
15normal operation as soon as possible.

16All six satellites have experienced some anomalies in the electric power subsystem and/or  
17payload instrument performance causing onboard electronic power shortages and payload  
18duty-cycle reduction. The SOCC and the operation team used operational methods to reduce  
19the impacts of the anomalies and increase the payload data output. It has proven difficult to  
20maintain the FS-3/C constellation in the current SOH status after four years in operation.

## 214.2 NOAA Ground Systems

22When FS-3/C was launched, ground station support was contracted with the Universal Space  
23Network (USN) through their stations at Poker Flats, Alaska and Kiruna, Sweden. USN  
24performed very well for 2 years, but in an effort to reduce operational costs NOAA made a  
25decision to employ indigenous resources. NOAA assets were established for FS-3/C at  
26Fairbanks Command & Data Acquisition Station (FCDAS) as well as Wallops Command &  
27Data Acquisition Station (WCDAS), and services were contracted with Kongsberg Satellite  
28Services (KSAT) at their Tromsø Satellite Station through NOAA agreements with the  
29Norwegian Space Centre. Since April 2008, NOAA stations have been providing both uplink  
30and downlink services and Tromsø has been providing downlink services only. Ground  
31station support availability for FS-3/C was required to perform at 90% or better. Over the  
32course of FS-3/C operations, ground stations services have performed at 95% or better with

1 only minor interruptions due to occasional equipment issues (hung servers or processors, for  
2 example).

3 [FS-3/C command uplink and telemetry downlink activities are coordinated by the NSPO](#)  
4 [SOCC with the Remote Tracking Stations \(RTS\). Once upcoming FS-3/C passes have been](#)  
5 [deconflicted with other ground station activities, SOCC generates spacecraft ephemeris,](#)  
6 [spacecraft command uploads and ground schedules and distributes the files to the ground](#)  
7 [stations. All contacts with the spacecraft are established and conducted autonomously via](#)  
8 [schedules executed at the SOCC and the RTS, with the exception of any real-time](#)  
9 [commanding conducted by Mission Control personnel at SOCC. During the pass, the](#)  
10 [spacecraft and ground system are autonomously monitored by SOCC as the data stored on the](#)  
11 [spacecraft is downlinked to the ground station. After the spacecraft contact has ended, all](#)  
12 [connections are autonomously terminated and the RTS data server forwards the Contact](#)  
13 [Report to the SOCC as well as the Payload Data Files to the Data Processing Centers for](#)  
14 [processing.](#)

15 FS-3/C mission data is distributed from data servers at the ground stations across the [open](#)  
16 [internet-world wide web](#) via Secure File Transfer Protocol (SFTP) to the SOCC and CDAAC.  
17 Figure 4 shows the flow of data between the RTS, SOCC and CDAAC. [One week prior to](#)  
18 [real-time, the spacecraft ephemerides \(2 line element sets\) and RTS pass schedules are made](#)  
19 [available to the mission team for operations.](#) Timeliness can vary but SFTP has been found to  
20 be a very reliable and inexpensive means for distributing the data globally. A typical post  
21 contact scenario consists of transferring real-time and non-real-time spacecraft data to SOCC,  
22 followed by the transfer of mission files to CDAAC and then to SOCC. Statistics show that  
23 mission data arrives at CDAAC for processing [within 15 minutes after spacecraft loss of](#)  
24 [signal \(LOS\), which is the end of the scheduled spacecraft contact with the ground station,](#)  
25 97% of the time.

### 264.3 Science Data Processing

27 The COSMIC Data Analysis and Archival Center (CDAAC) at UCAR currently processes  
28 COSMIC data in near real-time for operational weather centers and the research community.  
29 The CDAAC also reprocesses RO data in a more accurate post-processed mode (within 6  
30 weeks of observation) for COSMIC and other missions such as: GPS/MET, CHAMP, SAC-C,  
31 GRACE, TerraSAR-X, (and METOP/GRAS in the near future). The data processing at the  
32 CDAAC includes: GPS site coordinate and zenith tropospheric delay (ZTD) estimation for a

1 global ground-based reference network, high-rate (30 second) GPS satellite clock estimation,  
2 LEO precision orbit determination, computation of L1 and L2 atmospheric excess phases  
3 (Schreiner et al., 2009), retrieval of neutral atmospheric bending angles and refractivity for  
4 each LEO occultation event (Kuo et al. 2004), estimation of absolute total electron content  
5 (TEC), and retrieval of electron density profiles (Schreiner et al., 1999). The CDAAC also  
6 provides COSMIC TIP calibrated radiance products. All COSMIC products are made  
7 available freely to the community at [www.cosmic.ucar.edu](http://www.cosmic.ucar.edu).

8 Since the launch of the FS-3/C constellation in April 2006, COSMIC has provided a large  
9 amount of valuable ~~payload~~ science data to the operational and research communities. As of  
10 Sept 1, 2010, COSMIC and CDAAC have produced over 2.5 million high quality neutral  
11 atmospheric and ionospheric sounding profiles, over 2.6 million absolute TEC data arcs, S4  
12 scintillation observations, over 16,000 [hours](#) of quality controlled TIP radiances, and a  
13 significant (but not centrally archived) amount of ground-based ~~CERTO~~/TBB observations.  
14 On average, COSMIC currently produces around 1,000 GPS-RO soundings per day.  
15 Approximately ninety percent of these are processed and delivered (via [the Global](#)  
16 [Telecommunications System](#) (-GTS) to operational centers within three hours. ~~T~~;  
17 the remaining ten percent have higher latency due to the satellites' inability to downlink every  
18 orbit (~100 minutes). The COSMIC RTSs are down-linking and forwarding the payload data  
19 to the CDAAC in less than 15 minutes on average. The CDAAC processes a single dump of  
20 payload data into profiles and forwards them to the GTS via NOAA in less than 10 minutes.  
21 The average latency of COSMIC data is currently approximately ~~75-90~~ minutes for single  
22 orbit dumps. The reliability of the RTS stations and the CDAAC near real-time processing  
23 system have been measured at greater than 95% and 99.5%, respectively.

## 245 **Lessons Learned from Encountered Technical Challenges**

25 This section contains highlights of some major challenges encountered and enhancements  
26 accomplished after twenty-four satellite-years (4 years x 6 satellites) of operation in orbit of  
27 the FS-3/C mission. There are many lessons learned from the four years [of](#) operations, which  
28 can be used to improve similar future missions (Fong et al., 2008a; Fong et al, 2008b; Fong et  
29 al., 2008c; Fong et al., 2009a; Fong et al., 2009b).

### 305.1 **Mission Lessons Learned**

31 Table 6 highlights three major mission lessons learned. They are: (1) the determination of the  
32 spacecraft communication frequency, (2) the prevention of the Radio Frequency Interference

1(RFI) among the three different payloads in each spacecraft, and (3) the quantity definition of  
2the radio occultation profiles.

### 35.2 Payload Lessons Learned

4The GOX payloads are performing well and reliably at the instrument level based on the  
5assessment of the available data as discussed in Section 3.2. However, there are some lessons  
6learned from the observed GOX performance at the payload subsystem level. The major  
7lessons learned from the data assessment at the GOX payload subsystem level, as summarized  
8in Table 7, are: (1) GOX POD ~~Low-low~~ SNR problem, (2) GOX OCC ~~Low-low~~ SNR  
9problem, and (3) GOX SNR ~~Decrease-decrease~~ at ~~h~~High ~~t~~Temperature.

### 105.3 Spacecraft System Lessons Learned

11The spacecraft state of health ~~is directly correlates directly~~ to the payload performance. The  
12FS-3/C spacecraft is a modified version of a heritage design of the successful ORBCOMM  
13spacecraft. However, the FS-3/C spacecraft, a micro-grade spacecraft (<100kg), is not  
14equipped with full comprehensive redundancy for avoiding single critical failure in design  
15and/or high reliability components in critical instruments for durability. Five major spacecraft  
16system lessons learned, as described in Table 8, are: (1) SSR (Solid State Recorder)/MIU  
17(Mission Interface Unit) GOX ~~d~~Data ~~d~~Dropouts, (2) ~~s~~Spacecraft ~~d~~Design ~~P~~philosophy, (3)  
18~~s~~Spacecraft ~~D~~downtime, (4) ~~c~~Computers ~~R~~resets/~~R~~reboots, and (5) ADCS (Attitude  
19Determination and Control Subsystem) ~~p~~Performance.

20

## 216 Design Improvements for the Follow-on System

### 226.1 Mission Trades and Improvements

23In order to apply the lessons learned from the FS-3/C program to create an operational  
24constellation, several mission trades have been studied. The results of the FS-7/C-2 mission  
25trade studies are summarized in Figure 5 (Fong et al., 2010; Yen et al., 2009; Yen et al.,  
262010).

27The FS-7/C-2 satellites will be equipped with the next-generation GNSS-RO receiver (TriG)  
28to collect more soundings per receiver. The TriG will have the ability to track GPS, Galileo  
29and GLONASS GNSS systems, which includes 29 operational GPS satellites, 18 planned  
30GLONASS, and 30 planned GALILEO satellites. The TriG mission payload receiver will

1 have the capability to receive the GPS L1/L2/L5 signals, the GALILEO E1/E5/E6 signals,  
2 and the GLONASS L1/L2/L5 signals. This payload instrument will significantly improve the  
3 amount of data collected, which will lead to improved mission applications.

4 Figure 6 depicts the proposed FS-7/C-2 mission architecture. The FS-7/C-2 program is  
5 planned to have 12 satellites, which will result in collecting 8,000 profiles per day. The  
6 mission baseline includes 6 satellites at low-inclination-angle orbit and 6 satellites at high-  
7 inclination-angle orbit so that the mission will collect more data from the low latitudes over  
8 what is currently being collected. Participants on the joint program will work together on the  
9 data processing and data utilization to improve the data processing aspect of the system.

### 10 6.2 Spacecraft Trades and Improvements

11 The FS-7/C-2 spacecraft will have improved payload performance, better attitude  
12 performance, simplified operation, simplified orbit transfer, increased data storage, and  
13 modular design for additional compatible science payloads. The spacecraft bus design  
14 intended for the follow-on system vs. the current FS-3/C bus design is shown in Table 9.

15 NSPO is responsible for the acquisition and management of the spacecraft for the FS-7/C-2  
16 Program. The acquisition goal is to acquire the twelve (12) spacecraft along with the  
17 spacecraft design, information on the development, manufacture, assembly, integration,  
18 testing, and operations from a spacecraft contractor through a procurement contract. NSPO  
19 will integrate the mission payloads onto the contractor-provided spacecraft and perform the  
20 required integral system testing at NSPO. Additionally, it is planned that the spacecraft  
21 contractor will provide the necessary support to the integral integration and test (I&T) at  
22 NSPO, and the launch site operations. The satellite (including spacecraft and payload) major  
23 milestones will be developed to incorporate the spacecraft development along with the  
24 subsequent production schedule of the spacecraft contractor and the integral satellite I&T at  
25 NSPO to meet the intended launch periods as illustrated in the NSPO-NOAA Joint Program  
26 Integrated Master Schedule.

27 NSPO also plans to develop an additional NSPO self-reliant spacecraft along with the RO  
28 mission payload to be launched during the second launch of the joint mission. NSPO will be  
29 responsible for the system/subsystem design that will meet the satellite System Performance  
30 Requirements and perform the integral satellite I&T and the launch site preparation activities.

### 31 6.3 Ground Trades and Improvements

1The biggest and probably most challenging improvement for the next generation ground  
2system will be meeting the objective latency requirement of 15 minutes. FS-7/C-2 threshold  
3latency of 45 minutes is expected to be easily achievable with twice per orbit data dumps in  
4each orbit plane and will be a great improvement over FS-3/C latency. Meeting the objective  
5latency of 15 minutes is more difficult to achieve. Data recovery trades are currently being  
6evaluated as part of the FS-7/C-2 mission definition to determine feasibility versus  
7affordability.

8A ground system solution for FS-7/C-2 that will meet threshold latency requirements will  
9likely employ 10 to 12 ground stations, 2 at each of the poles and 6 to 8 around the equator, to  
10capture data from satellites in both orbit planes. The high-inclination orbit plane will be  
11supported by the existing polar sites at Fairbanks, Wallops, Tromsø, and McMurdo, and will  
12require an additional station inside the Antarctic Circle to complement McMurdo. For the  
13low-inclination orbit plane, a host of new equatorial ground stations will be required.  
14Conceptually there would be 3-4 ground stations in the Americas and an additional set of 3-4  
15in Asia-Indonesia. Figure 7 shows an optimized set of potential ground station locations to  
16meet the low-inclination orbit plane threshold latency, as well as providing coverage for some  
17of the high-inclination orbit plane passes. The yellow circles are the 10 degree elevation  
18coverage circle of the potential ground stations, when LEO satellite passes within this yellow  
19circle, then satellite could be acquired by the ground station located in the circle center. In the  
20figure, the upper red line is 24 degree northern latitude, and the lower red line is the 24 degree  
21southern latitude. These two lines are the upper and lower bound of the low-inclination  
22satellite trajectories of the launch #1. Trades are currently being performed to look at existing  
23ground station options versus deploying FS-7/C-2 unique sites that are optimized to meet  
24mission needs.

25To meet the objective latency, two options are currently being studied – a more extensive  
26network of ground stations ~~versus~~ and crosslink via the National Aeronautic and Space  
27Administration's (NASA) Tracking and Data Relay Satellite System (TDRSS). Both are  
28currently being considered as part of this trade and implementation will depend largely on the  
29total cost to deploy and operate the option. A ground station solution will be difficult to  
30deploy but if stations could be leveraged from existing sites and/or future programs it may be  
31more feasible and very cost effective to operate. On the other hand, TDRSS would be  
32relatively easy to deploy but be potentially expensive for long term service.

1 Another item in the ground system trade is alternate data transfer options from the ground  
2 stations to the data processing centers to better meet latency needs of multiple users. SFTP via  
3 ~~open internet~~ the world wide web to multiple users, including potential secondary payload data  
4 centers, may not provide adequate latency. Dedicated communication lines may be required to  
5 meet the more stringent latency requirements.

#### 6 **6.4 Data Processing Trades and Improvements**

7 Data processing architecture for FS-7/C-2 will remain relatively the same as FS-3/C but will  
8 require ~~reliable~~ and low latency input data from FS-7/C-2 GNSS-RO payloads and GNSS  
9 ground network, updates to data processing software including GNSS (GPS, Galileo, and  
10 Glonass) capability, and more computational power to support the improved and additional  
11 number of RO instruments. To make data processing more robust for an operational  
12 environment, a data processing system (DPS) will be installed at the Environmental Satellite  
13 Processing Center (ESPC) in NOAA's Satellite Operations Facility (NSOF) in Suitland,  
14 Maryland. ESPC will be the prime data processing center in the United States for FS-7/C-2,  
15 providing GNSS-RO data products to the operational weather community. NOAA will  
16 provide long-term archive of FS-7/C-2 data in their Comprehensive Large Array-Data  
17 Stewardship System (CLASS).

18

#### 19 **7 Conclusion**

20 The FS-3/C satellites have performed successfully for over 4 years ~~now~~. It is not a perfect  
21 constellation for an operational system, but it has achieved more than satisfactory results for  
22 an experimental system operating in a semi-operational manner. The FS-3/C satellites are  
23 degrading as anticipated; however, NSPO assesses these satellite will continue to operate in a  
24 reduced capacity into-for the next few years. The success of the FS-3/C mission has initiated  
25 a new era for near real-time operational use of GNSS-RO soundings. NSPO is committed to  
26 continuing the FS-3/C satellite constellation operation to collect RO data to minimize the data  
27 gap duration between the end of FS-3/C and the beginning of FS-7/C-2. NSPO and NOAA  
28 ~~will proceed with~~ have already begun the FS-7/C-2 joint mission implementation.

29

#### 30 **Acknowledgements**



1The authors would like to thank the spacecraft team for providing four-year statistical trend  
2data in various subsystems. They would like to thank the contributions of the FS-3/C  
3pProgram, the FS-7/C-2 Pprogram, mission operations, flight operations, ground operations,  
4constellation deployment, and anomaly resolution teams; the Taiwan science teams; and the  
5cooperation partners with the NSC, NARL, CWB, NSF, UCAR, NCAR, JPL/NASA, NRL,  
6USAF, OSC, and NOAA.

## 1References

- 2Anthes, R. A., Rocken, C. & Kuo, Y. H.: Application of COSMIC to Meteorology and  
3Climate, Terrestrial, Atmospheric and Oceanic Sciences, Vol. 11, No.1, pp. 115-156, 2000.
- 4Anthes, R. A., Bernhardt, P. A., Chen, Y., Cucurull, L., Dymond, K. F., Ector, D., Healy, S.  
5B., Ho, S.-P., Hunt, D. C., Kuo, Y.-H., Liu, H., Manning, K., McCormick, C., Meehan, T. K.,  
6Randel, W. J., Rocken, C., Schreiner, W. S., Sokolovskiy, S. V., Syndergaard, S., Thompson,  
7D. C., Trenberth, K. E., Wee, T. K., Yen, N. L., and Zeng, Z.: The COSMIC / FORMOSAT-3  
8Mission: Early Results, Bulletin of the American Meteorological Society, Vol. 89, No.3, pp.  
9313-333, doi:10.1175/BAMS-89-3-313, 2008.
- 10Chu, C.-H., Yen, N., Hsiao, C.-C., Fong, C.-J., Yang, S.-K., Liu, T.-Y., Lin, Y.-C., and Miao,  
11J.-J.: Earth observations with orbiting thermometers – prospective FORMOSAT-3 / COSMIC  
12follow-on mission, Proceedings of Small Satellite Conference 2008, Logan, Utah., USU,  
13Logan, 2008.
- 14Fong, C.-J., Shiau, A., Lin, T., Kuo, T.-C., Chu, C.-H., Yang, S.-K., Yen, N., Chen, S. S.,  
15Huang, C.-Y., Kuo, Y.-H., Liou, Y.-A., and Chi, S.: Constellation deployment for  
16FORMOSAT-3/COSMIC mission, IEEE Transactions on Geoscience and Remote Sensing,  
17Vol. 46, No.11, pp. 3367-3379, doi:10.1109/TGRS.2008.2005202, 2008a.
- 18Fong, C.-J., Yang, S.-K., Chu, C.-H., Huang, C.-Y., Yeh, J.-J., Lin, C.-T., Kuo, T.-C., Liu, T.-  
19Y., Yen, N., Chen, S. S., Kuo, Y.-H., Liou, Y.-A., and Chi, S.: FORMOSAT-3 / COSMIC  
20constellation spacecraft system performance: After One Year in Orbit, IEEE Transactions on  
21Geoscience and Remote Sensing, Vol. 46, No.11, pp. 3380-3394,  
22doi:10.1109/TGRS.2008.2005203, 2008b.
- 23Fong, C.-J., Huang, C.-Y., Chu, V., Yen, N., Kuo, Y.-H., Liou, Y.-A., and Chi, S.: Mission  
24results from FORMOSAT-3/COSMIC constellation system, AIAA Journal of Spacecraft and  
25Rockets, Vol. 45, No. 6, pp. 1293-1302, doi:10.2514/1.34427, 2008c.
- 26Fong, C.-J., Yen, N. L., Chu, C.-H., Yang, S.-K., Shiau, W.-T., Huang, C.-Y., Chi, S., Chen,  
27S.-S., Liou, Y.-A., and Kuo, Y.-H.: FORMOSAT-3/COSMIC spacecraft constellation system,  
28mission results, and prospect for follow-on mission, Terrestrial, Atmospheric and Oceanic  
29Sciences, Vol. 20, doi:10.3319/TAO.2008.01.03.01(F3C), 2009a.

1Fong, C.-J., Yen, N. L., Chu, C.-H., Hsiao, C.-C., Liou, Y.-A., and Chi, S.: Space-based  
2Global Weather Monitoring System – FORMOSAT-3/COSMIC Constellation and its Follow-  
3On Mission, AIAA Journal of Spacecraft and Rockets, Vol. 46, No. 4, pp 883-891, doi:  
410.2514/1.41203, 2009b.

5Fong, C.-J., Whiteley, D., Yang E., Cook, K., Chu, V., Schreiner, B., Ector, D., Wilczynski,  
6P., and Yen, N.Y.: Space & Ground Segment Performance of the FORMOSAT-3 / COSMIC  
7Mission: Four Years in Orbit, Joint OPAC-4 & GRAS-SAF Climate & IROW-1 Workshop,  
8Graz, Austria, 2010.

9[Hajj, G. A., Lee, L. C., Pi, X., Romans, L. J., Schreiner, W. S., Straus, P. R., and Wang, C.:](#)  
10[COSMIC GPS ionospheric sensing and space weather, Terr. Atmos. and Ocean. Sci., 11\(1\),](#)  
11[11235-272, 2000.](#)

12[Kursinski, E. R., Hajj, G. A., Bertiger, W. I., Leroy, S. S., Meehan, T. K., Romans, L. J.,](#)  
13[Schofield, J. T., McCleese, D. J., Melbourne, W. G., Thornton, C. L., Yunck, T. P., Eyre, J. R.](#)  
14[and Nagatani, R. N.: Initial results of radio occultation observations of Earth's atmosphere](#)  
15[using the Global Positioning System, Science, 271\(5252\), 1107-1110, 1996.](#)

16Kuo, Y.-H., Sokolovskiy, S., Anthes, R., and Vandenberghe, V.: Assimilation of GPS radio  
17occultation data for numerical weather prediction, Terrestrial, Atmospheric and Oceanic  
18Sciences, Vol. 11, No. 1, pp. 157–186, 2000.

19Kuo, Y.-H., Wee, T.-K., Sokolovskiy, S., Rocken, C., Schreiner, W., Hunt, D., and Anthes, R.  
20A.: Inversion and Error Estimation of GPS Radio Occultation Data, Journal of the  
21Meteorological Society of Japan, Vol. 82, No. 1B, pp. 507-531, doi:10.2151/jmsj.2004.507,  
222004.

23Kuo, Y.-H., Liu, H., Ma, Z. and Guo, Y.-R.: The Impact of FORMOSAT-3/COSMIC GPS  
24Radio Occultation, Proceedings of 4th Asian Space Conference and 2008 FORMOSAT-3 /  
25COSMIC International Workshop, Taipei, Taiwan, NSPO, Hsinchu, Taiwan, 2008.

26Liou, Y.-A., Pavelyev, A. G., Liu, S. F., Pavelyev, A. A., Yen, N., Huang, C. Y., and Fong,  
27C.-J.: FORMOSAT-3 GPS radio occultation mission: preliminary results,” IEEE Transactions  
28on Geoscience and Remote Sensing, Vol. 45, No. 10, pp. 3813-3824,  
29doi:10.1109/TGRS.2007.903365, 2007.

30[Luntama, J.-P., Kirchengast, G., Borsche, M., Foelsche, U., Steiner, A., Healy, S., von](#)  
31[Engeln, A., O'Clérigh, E., Marquardt, C.: Prospects of the EPS GRAS Mission For](#)

1Operational Atmospheric Applications, *Bull. Am. Meteorol. Soc.*, 89(12), 1863-1875, doi:  
210.1175/2008BAMS2399.1, 2008.

3Melbourne, W. G.: *Radio Occultation Using Earth Satellites: A Wave Theory Treatment*,  
4John Wiley & Sons, Inc., ISBN 0-471-71222-1, 2005.

5Perona, G., Notarpietro, R., Gabella, M.: GPS radio occultation on-board the OCEANSAT-2  
6mission: An Indian (ISRO) – Italian (ASI) collaboration, *Indian Journal of Radio Space*  
7*Physics*, 36(5), 386-393, 2007.

8Rius, A., Ruffini, G., and Romeo, A.: Analysis of ionospheric electron-density distribution  
9from GPS/MET occultations, *IEEE Trans. Geosci. Remote Sens.*, 36(2), 383-394, 1998.

10Schreiner, W.S., Sokolovskiy, S. V., Rocken, C., and Hunt, D.C.: Analysis and Validation of  
11GPS/MET Radio Occultation Data in the Ionosphere, *Radio Sci.*, 34(4), 949-966,  
12doi:10.1029/1999RS900034, 1999.

13Schreiner, W.S., Rocken, C., Sokolovskiy, S., and Hunt, D.C.: Quality assessment of  
14COSMIC/FORMOSAT-3 GPS radio occultation data derived from single- and double-  
15difference atmospheric excess phase processing. *GPS Solutions*, 14(1), 13-22,  
16doi:10.1007/s10291-009-0132-5, 2009.

17Ware, R., Rocken, C., Solheim, F., Exner, M., Schreiner, W., Anthes, R., Feng, D., Herman,  
18B., Gorbunov, M., Sokolovskiy, S., Hardy, K., Kuo, Y., Zou, X., Trenberth, K., Meehan, T.,  
19Melbourne, W., and Businger, S.: GPS sounding of the atmosphere from low earth orbit:  
20Preliminary results, *Bull. Am. Meteorol. Soc.*, 77(1), 19-40, 1996.

21Yen, N. L. and Fong, C.-J.: FORMOSAT-3 Evaluation Report and Follow-on Mission Plan,  
22NSPO-RPT-0047\_0000, National Space Organization (NSPO), Hsinchu, Taiwan, 2009.

23Yen, N. L.: FORMOSAT-3/COSMIC Follow-On Mission Plan and Current Progress, Joint  
24OPAC-4 & GRAS-SAF Climate & IROW-1 Workshop, Graz, Austria, 2010.

25Yunck, T. P., Liu, C. H. and Ware, R.: A History of GPS Sounding, *Terrestrial, Atmospheric*  
26*and Oceanic Sciences*, Vol. 11, No.1, pp. 1-20, 2000.

27

## 28Appendix: Acronyms and Abbreviations

29ACE Attitude Control Electronics

- 1 [ADCS Attitude Determination and Control Subsystem](#)
- 2 [AFWA Air Force Weather Agency](#)
- 3 [Ant# Antenna No. #](#)
- 4 [ATT Attitude](#)
- 5 [BCR Battery Charge Regulator](#)
- 6 [C&DH Command and Data Handling](#)
- 7 [CDAAC COSMIC Data Analysis and Archive Center](#)
- 8 [CHAMP Challenging Minisatellite Payload](#)
- 9 [COSMIC Constellation Observing Systems for Meteorology, Ionosphere, and Climate](#)
- 10 [Canada Met Canadian Meteorological Centre](#)
- 11 [CLASS Comprehensive Large Array-Data Stewardship System](#)
- 12 [CSSA Coarse Sun Sensor Assembly](#)
- 13 [CSSA# Coarse Sun Sensor Assembly no. #](#)
- 14 [CWB Central Weather Bureau](#)
- 15 [DC Direct Current](#)
- 16 [dMdC Derivative of Battery Molecular to Charge](#)
- 17 [DPC Data Processing Center](#)
- 18 [DPS Data Processing System](#)
- 19 [ECMWF European Centre for Medium-range Weather Forecast](#)
- 20 [EPS Electrical Power Subsystem](#)
- 21 [ESPC Environmental Satellite Processing Center](#)
- 22 [FB Firmware Build](#)
- 23 [FC Flight Computer](#)
- 24 [FCDAS Fairbanks Command and Data Acquisition Station](#)
- 25 [FDC Failure Detection Correction](#)
- 26 [FM Flight Model](#)

- 1FM# Flight Model no. #
- 2FPGA Field Programmable Gate Array
- 3FS-3 FORMOSAT-3
- 4FS-7/C-2 FORMOSA SATellite mission no.7/ Constellation Observing Systems for  
5 Meteorology, Ionosphere, and Climate mission no. 2
- 6FSW Flight Software
- 7GLONASS Global Navigation Satellite System
- 8GNSS Global Navigation Satellite Systems
- 9GPS Global Positioning System
- 10GPS/MET GPS/Meteorology
- 11GOX GPS Occultation Receiver
- 12GPSR GPS Receiver
- 13GRACE Gravity Recovery and Climate Experiment
- 14GTS Global Telecommunications System
- 15I&T Integration and Test
- 16IV&V Independent Verification and Validation
- 17JMA Japan Meteorological Agency
- 18JPL Jet Propulsion Laboratory
- 19JSCDA Joint Center for Satellite Data Assimilation
- 20KSAT Kongsberg Satellite Services Ground Station
- 21LEO Low-Earth-Orbit
- 22LOS Loss of Signal
- 23LTS Local Tracking Station
- 24MAG Magnetometer
- 25Météo-France French National Meteorological Service
- 26MIU Mission Interface Unit

- 1 [NARL National Applied Research Laboratories](#)
- 2 [NASA National Aeronautics and Space Administration](#)
- 3 [NCAR National Center for Atmospheric Research](#)
- 4 [NCEP National Centers for Environmental Prediction](#)
- 5 [NESDIS National Environmental Satellite, Data, and Information Service](#)
- 6 [NOAA National Oceanic and Atmospheric Administration](#)
- 7 [NSC National Science Council](#)
- 8 [NSF National Science Foundation](#)
- 9 [NSOF NOAA's Satellite Operations Facility](#)
- 10 [NSPO National Space Organization](#)
- 11 [NWP Numerical Weather Prediction](#)
- 12 [OCC# Occultation No. #](#)
- 13 [OSC Orbital Sciences Corporation](#)
- 14 [PCM Power Control Module](#)
- 15 [PL Payload](#)
- 16 [POD Precision Orbit Determination](#)
- 17 [POD# Precision Orbit Determination No. #](#)
- 18 [RF Radio Frequency](#)
- 19 [RF# Radio Frequency No. #](#)
- 20 [RFI Radio Frequency Interference](#)
- 21 [RO Radio Occultation](#)
- 22 [RTS Remote Tracking Station](#)
- 23 [RWA Reaction Wheel Assembly](#)
- 24 [SAA South Atlantic Anomaly](#)
- 25 [SAC-C Satellite de Aplicaciones Cientificas-C](#)
- 26 [SADA Solar Array Drive Assembly](#)

- 1 [S/C](#) [Spacecraft](#)
- 2 [SFTP](#) [Secure File Transfer Protocol](#)
- 3 [SNR](#) [Signal-to-Noise Ratio](#)
- 4 [SOC](#) [State-of-Charge](#)
- 5 [SOCC](#) [Satellite Operations Control Center](#)
- 6 [SOH](#) [State-of-Health](#)
- 7 [SSR](#) [Solid State Recorder](#)
- 8 [TACC](#) [Taiwan Analysis Center for COSMIC](#)
- 9 [TBB](#) [Tri-Band Beacon](#)
- 10 [TBR](#) [To Be Reviewed](#)
- 11 [TDRSS](#) [Tracking and Data Relay Satellite System](#)
- 12 [TEC](#) [Total Electron Content](#)
- 13 [TIP](#) [Tiny Ionospheric Photometer](#)
- 14 [UCAR](#) [University Corporation for Atmospheric Research](#)
- 15 [UKMO](#) [United Kingdom Meteorological Office](#)
- 16 [USA](#) [United States of America](#)
- 17 [USAF](#) [United States Air Force](#)
- 18 [USN](#) [United Service Network](#)
- 19 [VC#](#) [Virtual Channel No. #](#)
- 20 [VIDI](#) [Velocity, Ion Density and Irregularities](#)
- 21 [WCDAS](#) [Wallops Command and Data Acquisition Station](#)
- 22 [ZTD](#) [Zenith Tropospheric Delay](#)



1Table 1. **Spacecraft** Mission Operation Status of Each Subsystem for All Six Spacecraft-

| S/C No. | Operational Mode        | Spacecraft State             | ADCS Mode | EPS Mode | C&DH Mode | GOX                          | TIP                | TBB                |
|---------|-------------------------|------------------------------|-----------|----------|-----------|------------------------------|--------------------|--------------------|
| FM1     | Normal                  | Normal                       | Fixed-Yaw | Normal   | High Rate | Operating                    | Low Beta Operating | Low Beta Operating |
| FM2     | Normal                  | Power Shortage (Note 5)      | Fixed-Yaw | Normal   | High Rate | Reduced Duty-Cycle Operating | Off (Note 1)       | Off (Note 1)       |
| FM3     | Normal @711 km (Note 3) | SADA Stuck (Note 3)          | Fixed-Yaw | Normal   | High Rate | Off (Note 4)                 | Off (Note 1)       | Off (Note 1)       |
| FM4     | Normal                  | Battery Degradation (Note 2) | Fixed-Yaw | Normal   | High Rate | Operating                    | Low Beta Operating | Low Beta Operating |
| FM5     | Normal                  | Normal                       | Fixed-Yaw | Normal   | High Rate | Operating (Low SNR)          | Low Beta Operating | Low Beta Operating |
| FM6     | Normal                  | Battery Degradation (Note 2) | Fixed-Yaw | Normal   | High Rate | Operating (Low SNR)          | Low Beta Operating | Low Beta Operating |

2Note: 1. Secondary payloads are power off due to power shortage.

3 2: Significant FM4 & FM6 battery degradations cause payload power off at high battery state-of-charge.

4 3: FM3 was kept at 711 km orbit due to stuck solar array drive.

5 4: FM3 has been in an abnormal condition (lost of communication) since July.

6 5: FM2 experienced a sudden solar panel power shortage with only one solar panel working.

7 SADA = Solar Array Drive Assembly

8 ADCS = Attitude Determination and Control Subsystem

9 EPS = Electrical Power Subsystem

10 C&DH = Command and Data Handling

11 [Low Beta = low sun beta angle](#)

1 Table 2. Spacecraft Constellation Performance Summary:

| S/C ID | Summary                                                                                                                                                                                                                                                                                                                                           |
|--------|---------------------------------------------------------------------------------------------------------------------------------------------------------------------------------------------------------------------------------------------------------------------------------------------------------------------------------------------------|
| FM1    | Bus GPSR GPS Non-Fixed -> Operation Solution<br>GOX RF1 (POD1/ANT0) Lower SNR -> GOX Reboot Loop -> GOX FB 4.4 Update<br>Payload Unexpected Off -> Battery Degradation<br>Bad Attitude                                                                                                                                                            |
| FM2    | BCR dMdc Charge Algorithm Issue -> FSW Update<br>Solar Array Power Shortage -> Reduced GOX Operation<br>GOX Reboot Loop -> GOX FB 4.4 Update<br>Battery Pressure Difference Anomaly -> FSW Update<br>PCM DC Converter Abnormally Off -> TBB & TIP Off<br>Loss of Communication -> Auto Recovery                                                   |
| FM3    | Loss of Communication -> Auto Recovery<br>Solar Array Driver Lockout -> Reduced GOX Operation<br>Bus GPSR GPS Non-Fixed -> Operation Solution<br>GOX RF1 (POD1/ANT0) Lower SNR -> GOX Reboot Loop -> GOX FB 4.4 Update<br>Payload Unexpected Off -> Battery Degradation                                                                           |
| FM4    | Bus GPSR GPS Non-Fixed (since Launch)-> Operation Solution<br>GOX RF1 (POD1/ANT0) Lower SNR -> GOX Reboot Loop -> GOX FB 4.4 Update<br>Payload Unexpected Off -> Battery Degradation -> On-Orbit Battery Refreshment                                                                                                                              |
| FM5    | GOX RF1 (POD1/ANT0) Lower SNR -> GOX Reboot Loop -> GOX FB 4.4 Update<br>GOX RF4 (OCC1/ANT3) SNR Decreasing-> Operation Solution<br>Bus GPSR degraded -> Operation Solution<br>Payload Unexpected Off -> Battery Degradation -> On-Orbit Battery Refreshment                                                                                      |
| FM6    | Loss of Communication -> -> Auto Recovery<br>Bus GPSR GPS Non-Fixed -> Operation Solution<br>GOX RF1 (POD1/ANT0) Lower SNR -> GOX Reboot Loop -> GOX FB 4.4 Update<br>GOX SNR decreasing at High Temp. -> Auto Recovery<br>Payload Unexpected Off -> Battery Degradation -> On-Orbit Battery Refreshment<br>Orbit Raise-Up -> Under Investigation |

2Note: GPSR = GPS Receiver, RF1 = Radio Frequency No. 1, Ant0 = Antenna No. 0, POD = Precision Orbit Determination, FB =  
3 Firmware Build, BCR = Battery Charge Regulator, dMdc= Derivative of Battery Molecular to Charge, FSW = Flight Software, RF4  
4 = Radio Frequency No. 4, Ant3 = Antenna No. 3, OCC1 = Occultation No. 1.

1 Table 3. Number of Occultation Profiles for Each GOX Instrument after Four Years in Orbit-

| <u>Atmosphere</u>                  | <u>FM1</u>    | <u>FM2</u>    | <u>FM3</u>    | <u>FM4</u>    | <u>FM5</u>    | <u>FM6</u>    | <u>Total</u>          |
|------------------------------------|---------------|---------------|---------------|---------------|---------------|---------------|-----------------------|
| <u>Operation Duration</u>          | <u>1,397</u>  | <u>1,282</u>  | <u>1,173</u>  | <u>1,424</u>  | <u>1,401</u>  | <u>1,302</u>  | <u>7,9791,442</u>     |
| <u>Atmosphere Profiles Per Day</u> | <u>285.07</u> | <u>229.48</u> | <u>242.94</u> | <u>333.37</u> | <u>248.73</u> | <u>242.96</u> | <u>1,468.06582.55</u> |
| <u>Total Atmosphere Profiles</u>   | 398,245       | 294,198       | 284,970       | 474,713       | 348,475       | 316,335       | 2,116,936             |
| <u>Ionosphere</u>                  | <u>FM1</u>    | <u>FM2</u>    | <u>FM3</u>    | <u>FM4</u>    | <u>FM5</u>    | <u>FM6</u>    | <u>Total</u>          |
| <u>Operation Duration</u>          | <u>1,293</u>  | <u>1,284</u>  | <u>1,173</u>  | <u>1,423</u>  | <u>1,286</u>  | <u>1,300</u>  | <u>7,7591,442</u>     |
| <u>Ionosphere Profiles Per Day</u> | <u>284.65</u> | <u>275.74</u> | <u>292.71</u> | <u>394.54</u> | <u>241.03</u> | <u>253.17</u> | <u>1,741.84571.4</u>  |
| <u>Total Ionosphere Profiles</u>   | 368,049       | 354,054       | 343,353       | 561,426       | 309,966       | 329,116       | 2,265,964             |

2

1Table 4. GOX Payload Performance Summaries:-

| S/C No. | GOX Duty Cycle | POD1<br>RF1<br>ANT0 | POD2<br>RF2<br>ANT1 | OCC2<br>RF3<br>ANT2 | OCC1<br>RF4<br>ANT3 | 60 day Average<br>Data Profile<br>(Mean/Peak) |
|---------|----------------|---------------------|---------------------|---------------------|---------------------|-----------------------------------------------|
| FM1     | 100 %          | Low SNR             | Normal              | Normal              | Normal              | 290/350                                       |
| FM2     | 80% -> 60%     | Normal              | Normal              | Normal              | Normal              | 200/320                                       |
| FM3     | 60% -> 36%     | Low SNR             | Normal              | Normal              | Normal              | 150/300                                       |
| FM4     | 100 %          | Normal              | Normal              | Normal              | Normal              | 300/420                                       |
| FM5     | 100 %          | Low SNR             | Low SNR             | Normal              | Low SNR             | 160/310                                       |
| FM6     | 100 %          | Low SNR             | Normal              | Normal              | Low SNR             | 130/300                                       |

2Note: POD1 = Precision Orbit Determination No. 1, POD2 = Precision Orbit Determination No. 2, OCC1 = Occultation No. 1, OCC2 =  
3 Occultation No. 2; RF1 = Radio Frequency No. 1, RF2 = Radio Frequency No. 2, RF3 = Radio Frequency No. 3, RF4 = Radio  
4 Frequency No. 4; and Ant0 = Antenna No. 0, Ant1 = Antenna No. 1, Ant2 = Antenna No. 2, Ant3 = Antenna No. 3.

5

6Table 5. Average Variation Rate per Year of Each Spacecraft Battery:-

| S/C ID | Batt V<br>Mean [V] | Batt V<br>Min [V] | Batt SOC<br>Max [Ah] | Batt SOC<br>Min [Ah] | PL Off<br>SOC | Remarks                                                                    |
|--------|--------------------|-------------------|----------------------|----------------------|---------------|----------------------------------------------------------------------------|
| FM1    | -0.034             | -0.104            | 1.169                | -0.657               | ~1.95         | Battery degradation since 2008/4<br>Battery over pressure                  |
| FM2    | -0.031             | -0.159            | -0.236               | -0.036               | ~1            | Battery degradation since 2008/10<br>Battery charging efficiency decreased |
| FM3    | -0.094             | -0.080            | 0.769                | 0.127                | ~0.45         | Battery degradation since 2008/10                                          |
| FM4    | -0.060             | -0.319            | 0.453                | 0.628                | ~2.5          | Battery degradation since 2007/12<br>Battery over pressure                 |
| FM5    | -0.026             | -0.122            | 0.617                | 0.596                | ~1.95         | Battery degradation since 2008/1                                           |
| FM6    | -0.042             | -0.249            | 1.213                | 1.184                | ~2.5          | Battery degradation since 2007/12<br>Battery over pressure                 |

7Note: PL = Payload

1Table 6. Mission Lessons Learned-

| Items                              | Implementation                                                                                                                                                                                                                                                | Observation / Major Finding                                                                                                                                                                                                                                        | Lessons Learned                                                                                                                                                                                                                                                                                                                                |
|------------------------------------|---------------------------------------------------------------------------------------------------------------------------------------------------------------------------------------------------------------------------------------------------------------|--------------------------------------------------------------------------------------------------------------------------------------------------------------------------------------------------------------------------------------------------------------------|------------------------------------------------------------------------------------------------------------------------------------------------------------------------------------------------------------------------------------------------------------------------------------------------------------------------------------------------|
| Spacecraft Communication Frequency | <ul style="list-style-type: none"> <li>- L-band downlink was chosen originally to simplify frequency coordination process</li> <li>- The downlink frequency was switched to S-band to avoid interference with on-board payload operating frequency</li> </ul> | <ul style="list-style-type: none"> <li>- <del>T</del>he S-band downlink frequency is operated under constraints due to the RFI with other NASA and ESA satellites-</li> </ul>                                                                                      | <ul style="list-style-type: none"> <li>- Frequency selection shall be coordinated in the feasibility study phase and reviewed by all parties (mission, science, payload provider, bus provider)-</li> </ul>                                                                                                                                    |
| RFI <del>A</del> among Payloads    | <ul style="list-style-type: none"> <li>- RFI was not tested at the spacecraft system level to identify the interference severity on the ground-</li> </ul>                                                                                                    | <ul style="list-style-type: none"> <li>- RFI was tested until on-orbit</li> <li>- GOX L2 signals <del>were</del> interfered <u>by-with</u> VHF&amp;L bands on TBB ALL-ON mode-</li> <li>- Consequently, TBB reduced its operations at 2-band mode only-</li> </ul> | <ul style="list-style-type: none"> <li>- Frequency selection shall be coordinated in the feasibility study phase and reviewed by all parties (mission, science, payload provider, bus provider)-</li> </ul>                                                                                                                                    |
| Radio Occultation Profiles         | <ul style="list-style-type: none"> <li>- Mission requirement is set at 2,500 occultation profiles per day on average based on the estimate from a “near-perfect” constellation situation (~ 3,000 profiles per day)-</li> </ul>                               | <ul style="list-style-type: none"> <li>- Two major factors seem to be under-estimated: (1) PL down time (2) data filtered out by data quality control (for example: low SNR, etc.)-</li> </ul>                                                                     | <ul style="list-style-type: none"> <li>- The flow-down of mission requirements <u>s</u> shall be carefully implemented in the success criteria <u>and</u> <u>shall</u> consider the downtime for each segment-</li> <li>- Improved S/C performance</li> <li>- Improved PL performance</li> <li>- Improve ground processing software</li> </ul> |

2Note: PL = Payload

1Table 7. Payload Lessons Learned-

| Items                                                   | Implementation                                                                                                                                                                                                                               | Observation / Major Finding                                                                                                                                                                                                                                                                                                                                                                                                        | Lessons Learned                                                                                                                                                                                                                                                                                                                      |
|---------------------------------------------------------|----------------------------------------------------------------------------------------------------------------------------------------------------------------------------------------------------------------------------------------------|------------------------------------------------------------------------------------------------------------------------------------------------------------------------------------------------------------------------------------------------------------------------------------------------------------------------------------------------------------------------------------------------------------------------------------|--------------------------------------------------------------------------------------------------------------------------------------------------------------------------------------------------------------------------------------------------------------------------------------------------------------------------------------|
| <p>GOX POD<br/>Low SNR<br/>Pproblem</p>                 | <p>- After GOX payload instrument, POD antenna cable link, and the POD antenna are assembled into the spacecraft, there is no without sufficient system level ground testing during system level I&amp;T-</p>                                | <p>- RF1 low SNR anomaly in lower beta angle. First happened to FM6 (2007-041), then FM1 (2007-261), FM5 (2007-302), and FM3 (2008-245). Only FM2 &amp; FM4 RF1 has no SNR problem<br/>- FM4 RF2 had low SNR problem since 2010-071, so FM4 now use RF1 only<br/>- FM5 RF2 started to show low SNR problem since 2010-160 in lower beta angle (&lt; 15 degree). If RF2 decays like RF1 did, FM5 GOX will generate no OCC data-</p> | <p>- Should conduct reversed engineering to find the true cause of the problem<br/>- Should conduct adequate SNR test/measurement in at the system level during the ground testing in the future similar programs</p>                                                                                                                |
| <p>GOX OCC<br/>Low SNR<br/>Pproblem</p>                 | <p>- GOX instrument, OCC cable link, and the OCC antenna may not be adequately modeled for thermal analysis for SNR sensitivity variations over the intended temperature range and the anticipated orbital conditions---</p>                 | <p>- FM5 RF4 low SNR in high beta angle while GOX temp&gt;40 deg C<br/>- Started from 2008-Day-082 whenever in higher beta angle period ( Beta  &gt; 40 degree) period<br/>- Higher minus beta angle has negative impact to the RO observed occultations number while RF4 is the setting antenna<br/>- FM6 RF4 unstable and SNR drops periodically (2009-032~2009-105, 2009-151~2009-192, 2010-141~now)</p>                        | <p>- Ground commands to temporarily operate the spacecraft at the fixed SADA configuration is- are able to cool down the GOX temperature below 35 degree C when beta &lt; -50 degree<br/>- The lesson learned is that the Ppayload thermal requirement and the related thermal analysis / testing should be properly implemented</p> |
| <p>GOX SNR<br/>Decrease at<br/>High<br/>Temperature</p> | <p>- Since 2009-035, FM6 SNR dropped; the RO profiles decreased to less than 100, FM6 only can generate good RO while GOX temp &lt; 25-<br/>- FM6 GOX S/N- ratio SNR decreases even when the temperature is not over its red high limit-</p> | <p>- Turn on GOX at definite time for one orbit at low beta angle, GOX On 4 hrs Off 4 hrs cycle to maintain GOX RO in a stable lower level around 120 profiles<br/>- After two months of minus beta angle (2009-086), S/C flipped back while RF3 is setting OCC antenna, GOX operates in full duty cycle, GOX RO increased to around 300 profiles-</p>                                                                             | <p>- GOX performance is decreasing even though the temperature is still within the limits-<br/>- GOX component detail thermal analysis, thermal verification, and thermal model correlation about thermal verification should be performed to make sure its component thermal design is OK-</p>                                      |

2Note: SADA = Solar Array Drive Assembly

1Table 8. Spacecraft System Lessons Learned-

| Items                                                                                                                      | Implementation                                                                                                                                                                                                                                                                                                                                                                                              | Observation / Major Finding                                                                                                                                                                                                                                                                                                                                                                                                                                                                                                                                                     | Lessons Learned                                                                                                                                                                                                                                                                                                                                                                                               |
|----------------------------------------------------------------------------------------------------------------------------|-------------------------------------------------------------------------------------------------------------------------------------------------------------------------------------------------------------------------------------------------------------------------------------------------------------------------------------------------------------------------------------------------------------|---------------------------------------------------------------------------------------------------------------------------------------------------------------------------------------------------------------------------------------------------------------------------------------------------------------------------------------------------------------------------------------------------------------------------------------------------------------------------------------------------------------------------------------------------------------------------------|---------------------------------------------------------------------------------------------------------------------------------------------------------------------------------------------------------------------------------------------------------------------------------------------------------------------------------------------------------------------------------------------------------------|
| SSR/MIU<br>GOX Data<br>Dropouts                                                                                            | <ul style="list-style-type: none"> <li>- GOX data dropout <del>s-</del> avoidance design was not implemented in the design requirements and the data dropouts scenario was not detected at <del>the</del> subsystem or system level-</li> <li>-</li> </ul>                                                                                                                                                  | <ul style="list-style-type: none"> <li>- GOX data dropouts occurred in almost every dump at the payload checkout in the early orbit phase</li> <li>- Separate VC1 and VC2 data dumps and perform double dumps to mitigate the data dropouts</li> </ul>                                                                                                                                                                                                                                                                                                                          | <ul style="list-style-type: none"> <li>- Reliable design of interface and protocol for data transfer should be specified in the hardware/software design requirements</li> <li>- No data dropouts must be proven and/or tested before flight</li> </ul>                                                                                                                                                       |
| Spacecraft<br>Design<br>Philosophy                                                                                         | <ul style="list-style-type: none"> <li>- FS-3/C is a proof-of-<del>constellation-operation-</del> concept experimental mission. High reliability and robust design was not implemented in this program-</li> <li>- FS-3/C uses single string design strategy</li> </ul>                                                                                                                                     | <ul style="list-style-type: none"> <li>- System Level FDC (Fault Detection &amp; Correction) strategy is applied to allow faults to happen and <del>the</del> <u>S/C</u> to recover from them</li> <li>- Temporary loss of the payload performance is <del>much more much-</del> significant for 1 out of 6 <del>spacecrafts-</del> <u>S/C</u> in the FS-3/C constellation than 1 out of <del>more than 30±</del> spacecraft <del>in a fleet</del> like in ORBCOMM <del>fleet</del> when using multiple spacecraft as the constellation design redundancy philosophy</li> </ul> | <ul style="list-style-type: none"> <li>- Apply robust design and high reliability design philosophy for the operational mission</li> <li>- Continue to apply system-<u>level FDC</u> and implement the necessary redundancy <del>implementation-design</del> in the spacecraft as well as in the constellation for the sufficient operational service availability in the follow-on mission</li> </ul>        |
| Spacecraft<br>Downtime                                                                                                     | <ul style="list-style-type: none"> <li>- Due to the single string design, the spacecraft may often encounter anomalies <del>and that</del> cause <del>the-</del> spacecraft downtime for various durations depending on the types of the anomalies—</li> <li>- <u>S/C</u> downtime events will force payload power off and will reduce the GOX RO science data volume-</li> </ul>                           | <ul style="list-style-type: none"> <li>- Top three causes of the spacecraft anomalies are attitude excursions, stabilized mode after thrust burn, and processor reboot/reset. <u>These causes and that they have occupied around have contributed to appx.</u> three quarters of all payload power off events-</li> <li>- Some anomalies can be resolved by the ground operation solution to maximize GOX RO science data volume-</li> </ul>                                                                                                                                    | <ul style="list-style-type: none"> <li>- Re-design ADCS thrust mode to be able to perform orbit maneuver correctly and improve ADCS performance</li> <li>- Use high reliable Processor / FPGA</li> <li>- Form a separate ADCS IV&amp;V team to evaluate ADCS design, simulation, and test results to prevent errors that cause <u>S/C</u> downtime-</li> </ul>                                                |
| <u>Computers</u><br><u>Resets /</u><br><u>Reboots</u><br><del>Computers</del><br><del>Resets /</del><br><del>Reboots</del> | <ul style="list-style-type: none"> <li>- <u>FS-3/C uses single string design strategy where none of the computers have a redundant design</u></li> <li>- <u>The occurrence frequency of the Single Event Upset (SEU) is not defined clearly in the requirements documents</u></li> <li>- <u>The SEU anomalies made the spacecraft lose valuable telemetry and payload data</u><del>FS-3/C-</del></li> </ul> | <ul style="list-style-type: none"> <li>- <u>262 out of 304 events are computer resets/reboots as-of-4-1-2010</u></li> <li>- <u>Most of the time and geo-locations the spacecraft anomalies that occurred are correlated to the space radiation environment</u></li> <li>- <u>Root cause is due to the occurrence of Single event upset (SEU) event in the South Atlantic Anomaly (SAA) and the polar</u></li> </ul>                                                                                                                                                             | <ul style="list-style-type: none"> <li>- <u>Spacecraft design with nonvolatile memory is recommended to secure lost critical spacecraft telemetry and payload data</u></li> <li>- <u>Higher level red-tolerant or radiation-hardening design should be considered in the future</u></li> <li>- <u>Similar FDC function should be also implemented S/C</u><del>The SEE anomalies made SC lost</del></li> </ul> |

| Items            | Implementation                                                                                                                                                                                                                                                                                                                                                                                                                                                                                                          | Observation / Major Finding                                                                                                                                                                                                                                                                                                                                                                                                                                                                                                                                                                                                                                                                                                                                                                                                                     | Lessons Learned                                                                                                                                                                                                                                                                                                                                                                                                                                                                                                     |
|------------------|-------------------------------------------------------------------------------------------------------------------------------------------------------------------------------------------------------------------------------------------------------------------------------------------------------------------------------------------------------------------------------------------------------------------------------------------------------------------------------------------------------------------------|-------------------------------------------------------------------------------------------------------------------------------------------------------------------------------------------------------------------------------------------------------------------------------------------------------------------------------------------------------------------------------------------------------------------------------------------------------------------------------------------------------------------------------------------------------------------------------------------------------------------------------------------------------------------------------------------------------------------------------------------------------------------------------------------------------------------------------------------------|---------------------------------------------------------------------------------------------------------------------------------------------------------------------------------------------------------------------------------------------------------------------------------------------------------------------------------------------------------------------------------------------------------------------------------------------------------------------------------------------------------------------|
|                  | <p>adapted the discrete computers architecture: Attitude Control Electronics (ACE), Battery Control Regulator (BCR), and Flight Computer (FC) FS-3/C uses single string design strategy that none of the discrete computers has any built in redundancy design.</p> <p>The occurrence frequency of the Single Event Upset (SEU) is not defined clearly in the requirement document.</p> <p>The SEU anomalies made the spacecraft lost valuable telemetry and payload data or external back-up unit for contingency—</p> | <p>regions</p> <ul style="list-style-type: none"> <li>- The spacecraft will be recovered automatically following system level Failure Detection and Correction (FDC) strategies. Totally 262 out of 304 events are computer resets/reboots as of 4-1-2010</li> <li>- Most of the time and geo-locations the spacecraft S/C anomalies occurred are closely correlated to the space radiation environment.</li> <li>- Root cause is due to the occurrence of Single event effects (SEEs) in the South Atlantic anomaly region and the polar region</li> <li>- are identified as the most probable root cause. The spacecraft</li> <li>- will be SC recovered automatically following system level Failure Detection and Correction (FDC) strategies.</li> <li>- Use High reliable Processor/FPGA</li> <li>- Use system FDC strategies.</li> </ul> | <p>valuable telemetry and payload data. A design with nonvolatile memory is recommended to secure lost of critical S/CS/C housekeeping and payload data for the future missions.</p> <ul style="list-style-type: none"> <li>- A Hhigher level red-tolerant or radiation-hardening design should be considered in the future</li> <li>- The Similar FDC design makes the C&amp;DH (and SC) can recover from anomalies automatically. A similar function should be also implemented in the future mission.</li> </ul> |
| ADCS Performance | <ul style="list-style-type: none"> <li>- The ADCS was equipped with only a coarse attitude sensor and without a rate sensor.</li> <li>- The sun sensor processing algorithm generated incorrect sun vector data from time to time periodically.</li> </ul>                                                                                                                                                                                                                                                              | <ul style="list-style-type: none"> <li>- The attitude performance is not stable and resulting in impacts to the GOX payload operation.</li> <li>- Singularity occurred at each orbit to the FS-3 magnetic-based controller/estimator.</li> <li>- The parameters of the attitude reference system have been tuned to gain better attitude performance.</li> </ul>                                                                                                                                                                                                                                                                                                                                                                                                                                                                                | <ul style="list-style-type: none"> <li>- Better performance of attitude sensor, for example star tracker, may be used to improve the ADCS dramatically.</li> <li>- Rate sensor, even the coarse rate sensor, will improve the Thrust Mode performance and therefore decrease the duration of the constellation deployment.</li> <li>- The three-wheel (or four-wheel) zero-momentum-bias linear control system to should be considered in the future missions</li> </ul>                                            |

1Note: SSR/MIU = Solid State Recorder/Mission Interface Unit, VC1 = Virtual Channel No. 1, VC2 = Virtual Channel No. 2, FDC =  
2 Failure Detection Correction, FPGA = Field Programmable gate Array , IV&V = Independent Verification and Validation,  
3 C&DH = Command and Data Handling , FS-3 = FORMOSAT-3.



1Table 9. Spacecraft Bus Design for Follow-on System vs. FS-3/C-

| Function                     | FS-7/C-2 Design Improvement                                                                                                                                                                           | FS-3/C Design                                                                                                                                              | Benefit                                                                                                     |
|------------------------------|-------------------------------------------------------------------------------------------------------------------------------------------------------------------------------------------------------|------------------------------------------------------------------------------------------------------------------------------------------------------------|-------------------------------------------------------------------------------------------------------------|
| Weight                       | ~150 kg (TBR)                                                                                                                                                                                         | 61 kg (w/ Propellant)                                                                                                                                      | Stacked or Single Launch Piggy-Back Launch                                                                  |
| Attitude Control Performance | 3-axis linear control<br>Roll/Yaw: +/-1 deg. (3σ)<br>Pitch: +/- 1 deg. (3σ)<br>3-Axis Gyro, 3-axis MAG, CSSAs, RWA x 3, Torque x 3, Star Tracker x 1                                                  | 3-axis nonlinear control<br>Roll/Yaw: +/-5 deg. (1σ)<br>Pitch: +/- 2 deg. (1σ)<br>Earth Sensor x 2, CSSA x 8, RWA x 1, Torque x 3, GPS Bus Receiver PL x 1 | Improved PL Performance<br>Better Attitude Performance<br>Simplified Operation<br>Simplified Orbit Transfer |
| Science Data Storage         | 250 MBytes                                                                                                                                                                                            | 128 MByte (32M for GOX)                                                                                                                                    | Simplified Operations                                                                                       |
| Avionics Architecture        | Centralized Architecture<br>Radiation - Hardness                                                                                                                                                      | Distributed Architecture<br>(Multiple Avionics Boxes)                                                                                                      | Simplified Integration<br>Harnessing & <del>Reduced</del> Mass<br><del>Reduced</del>                        |
| Electrical Power             | Lithium Ion Battery<br>Voltage Based Algorithm                                                                                                                                                        | Ni-H2 Battery<br>dM/dC Charging Algorithm                                                                                                                  | Reduced Mass & Volume<br>Simplified Operations                                                              |
| Structure                    | Aluminum (Al)                                                                                                                                                                                         | Metal Matrix                                                                                                                                               | <del>Reduced</del> Cost <del>Reduced</del>                                                                  |
| Payload Interface            | <del>- Main-Mission PL: TriG Rcvr</del><br><del>- Science PL VIDI &amp; Radio Frequency (RF) Beacon on low inclination satellites</del><br><del>- Science PL on high inclination satellites TBD</del> | <del>- Primary PL: GOX</del><br><del>- Secondary PL: TIP, TBB</del>                                                                                        | Modular Design<br><del>Reduced</del> Cost <del>Reduced</del>                                                |

2Note: TBR = To Be Reviewed, TBD = To Be Determined, MAG = Magnetometer, CSSAs = Coarse Sun Sensor Assemblies, RWA =

3 Reaction Wheel Assembly, VIDI = Velocity, Ion Density and Irregularities

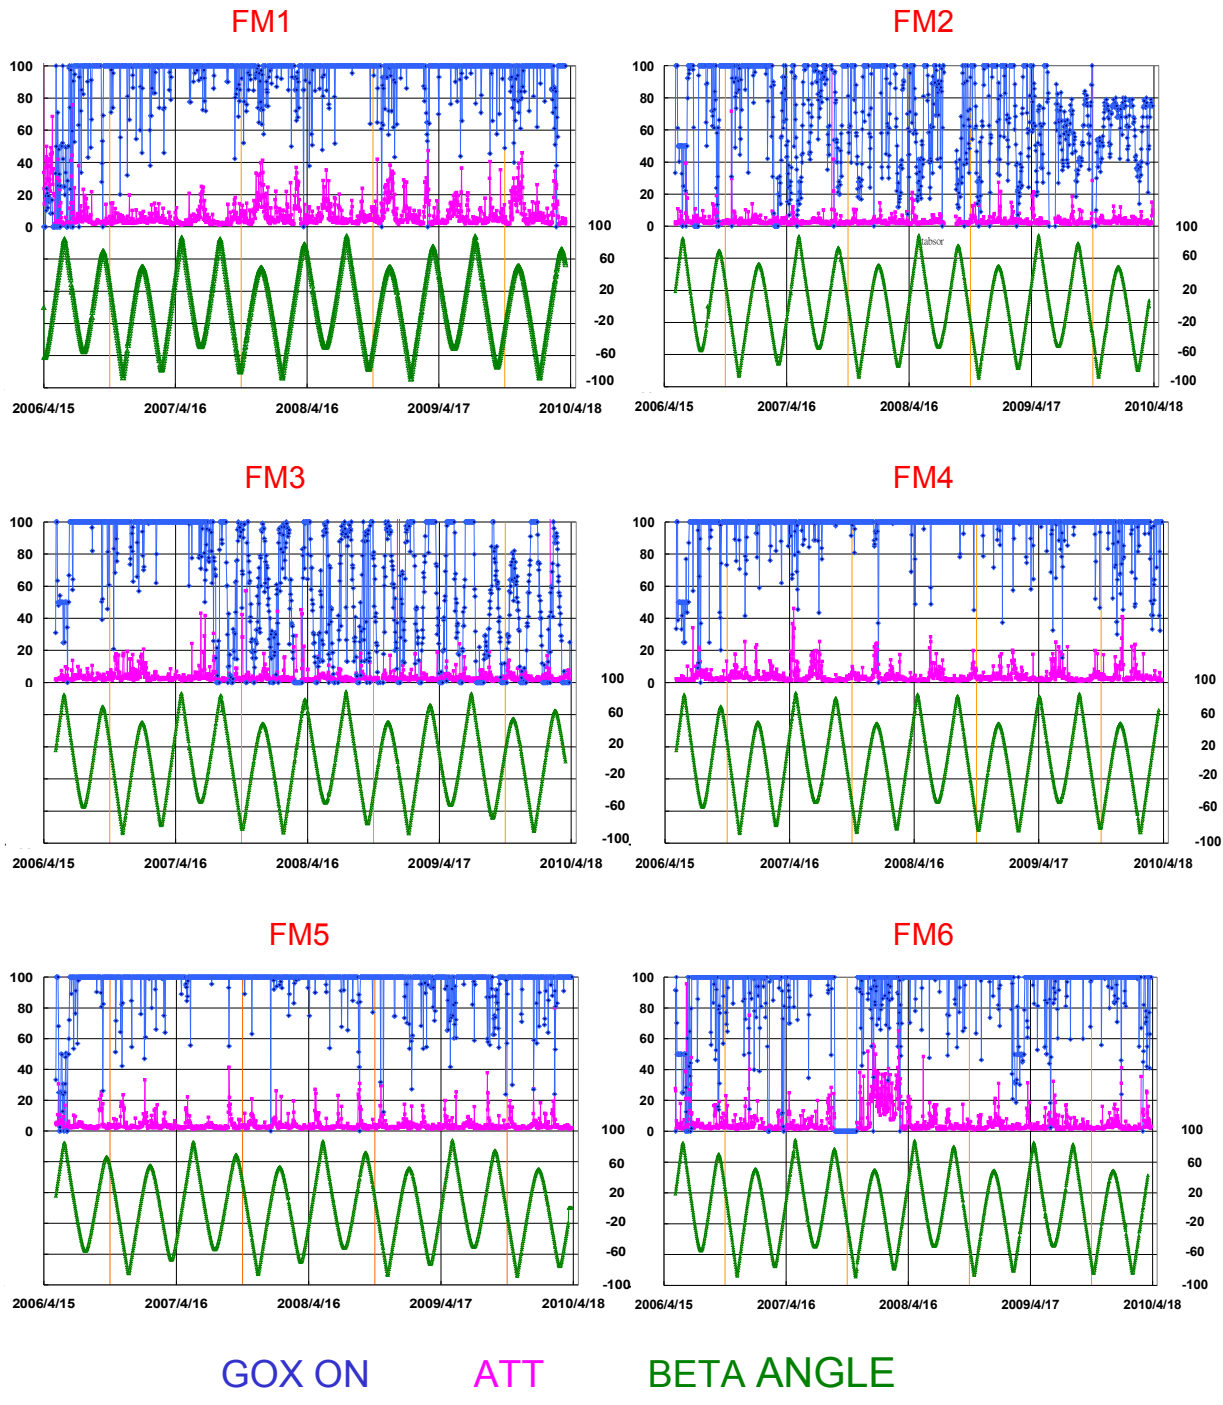

Figure 1. Spacecraft System Performance after Four Years in Orbit-

1

*Atmospheric* *Ionospheric*

**Total 2,116,936 since launch** **Total 2,265,964 since launch**

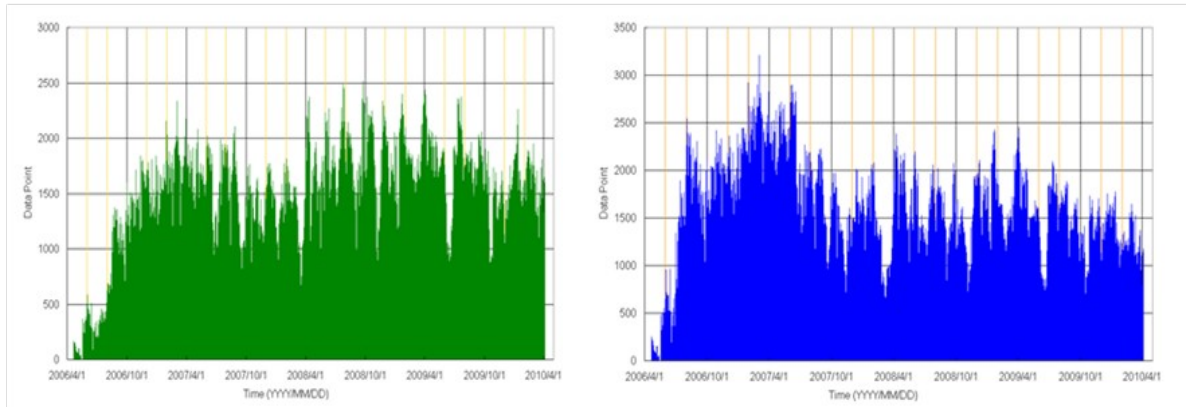

2

3

(a)

(b)

4 Figure 2. Four-Year Statistics Showing the Number of Daily Occultation Events (as-of-  
5 4/5/2010) for (a) Atmosphere Profiles, and (b) Ionosphere Profiles of Electron Density-

6

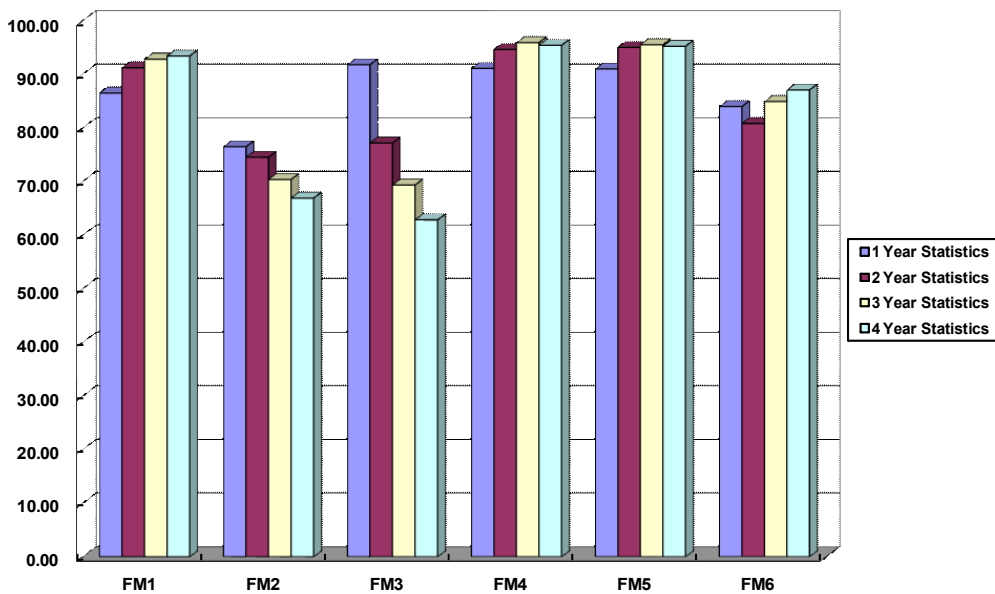

7

8 Figure 3. GOX Payload Duty Cycle On Statistics for One to Four Years-

9

1

1

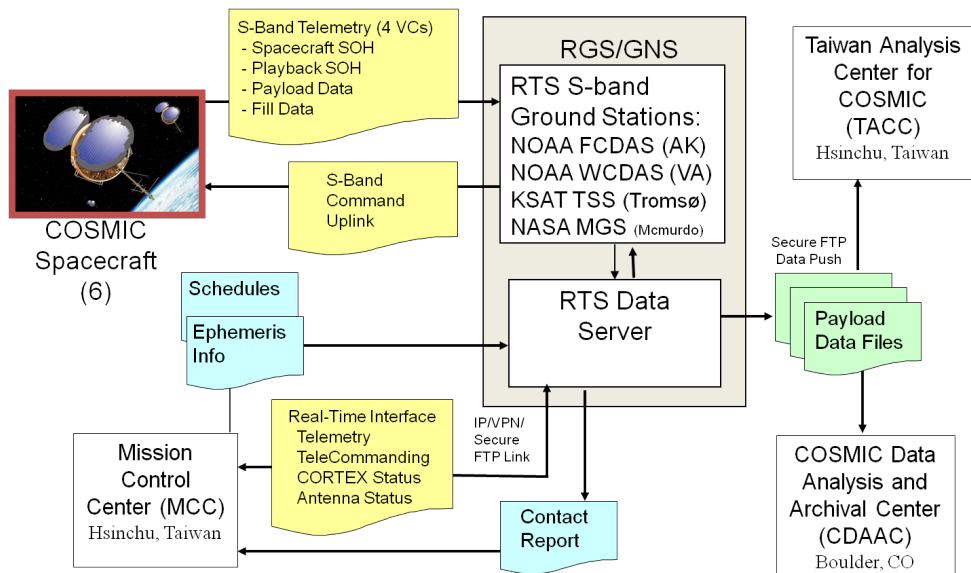

2

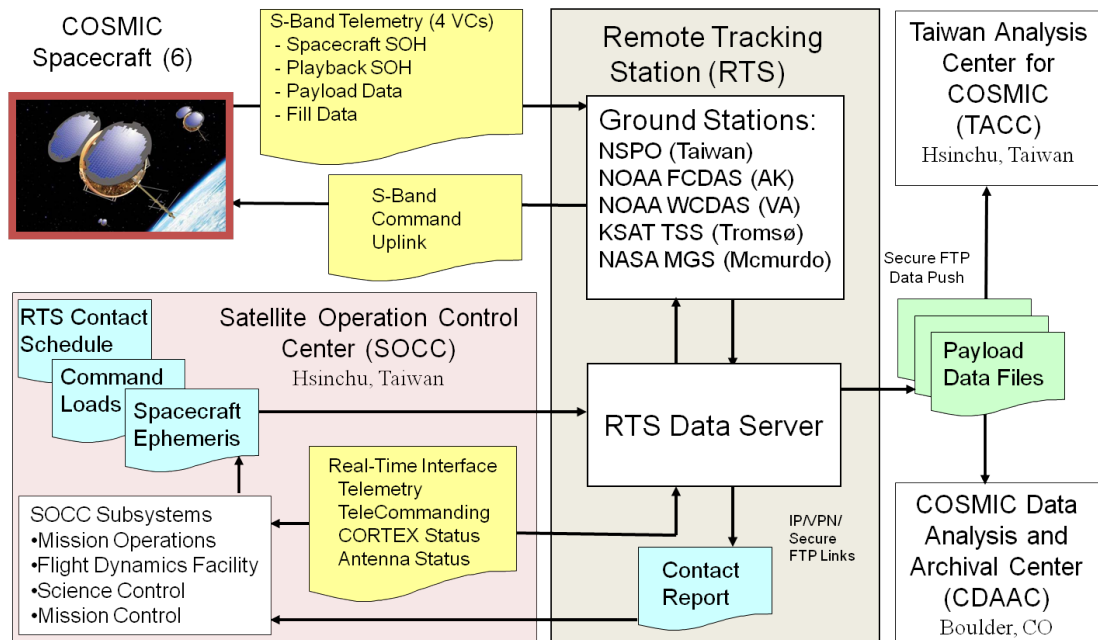

3

Figure 4. FS-3/C Ground System Data Flow-

1

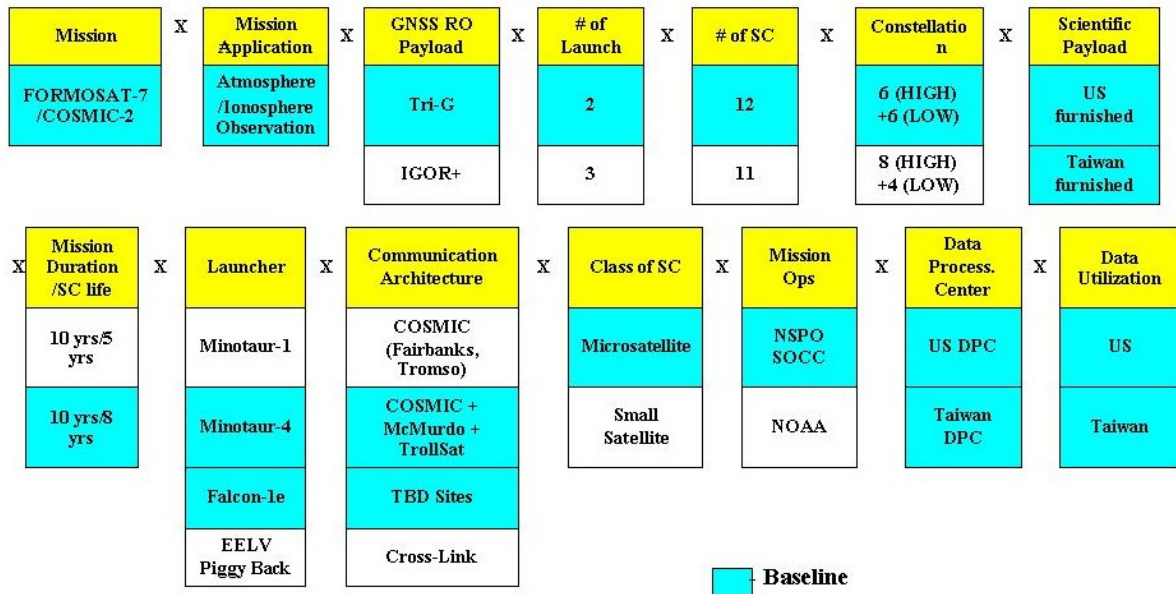

1

2

Figure 5. FS-7/C-2 Mission Trades:

3

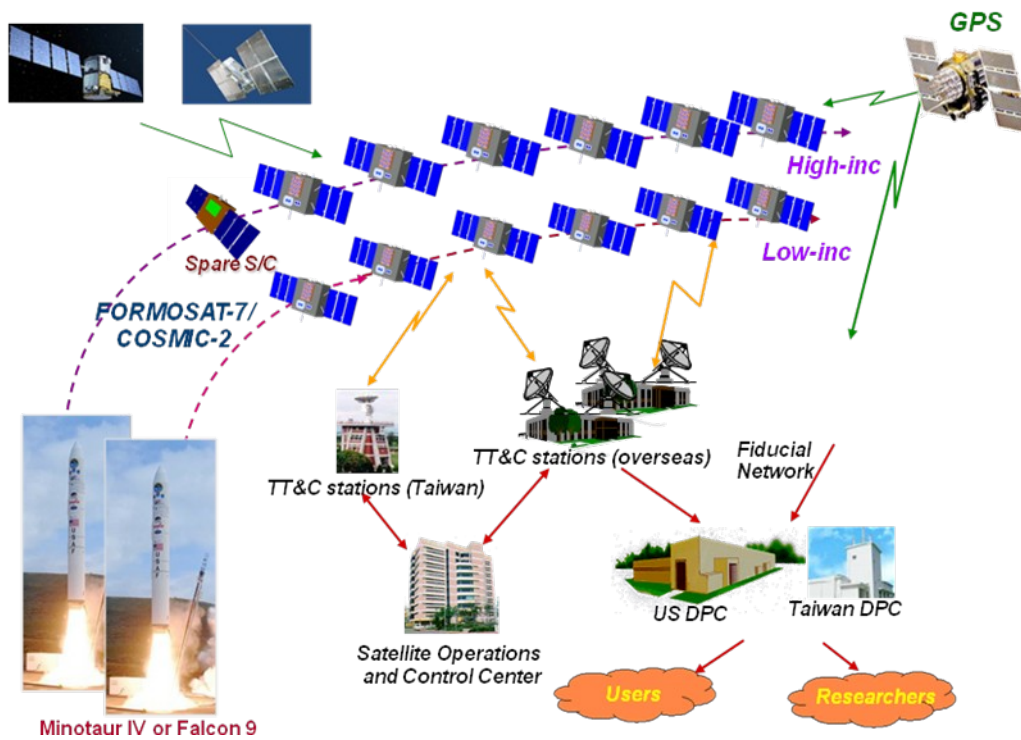

1

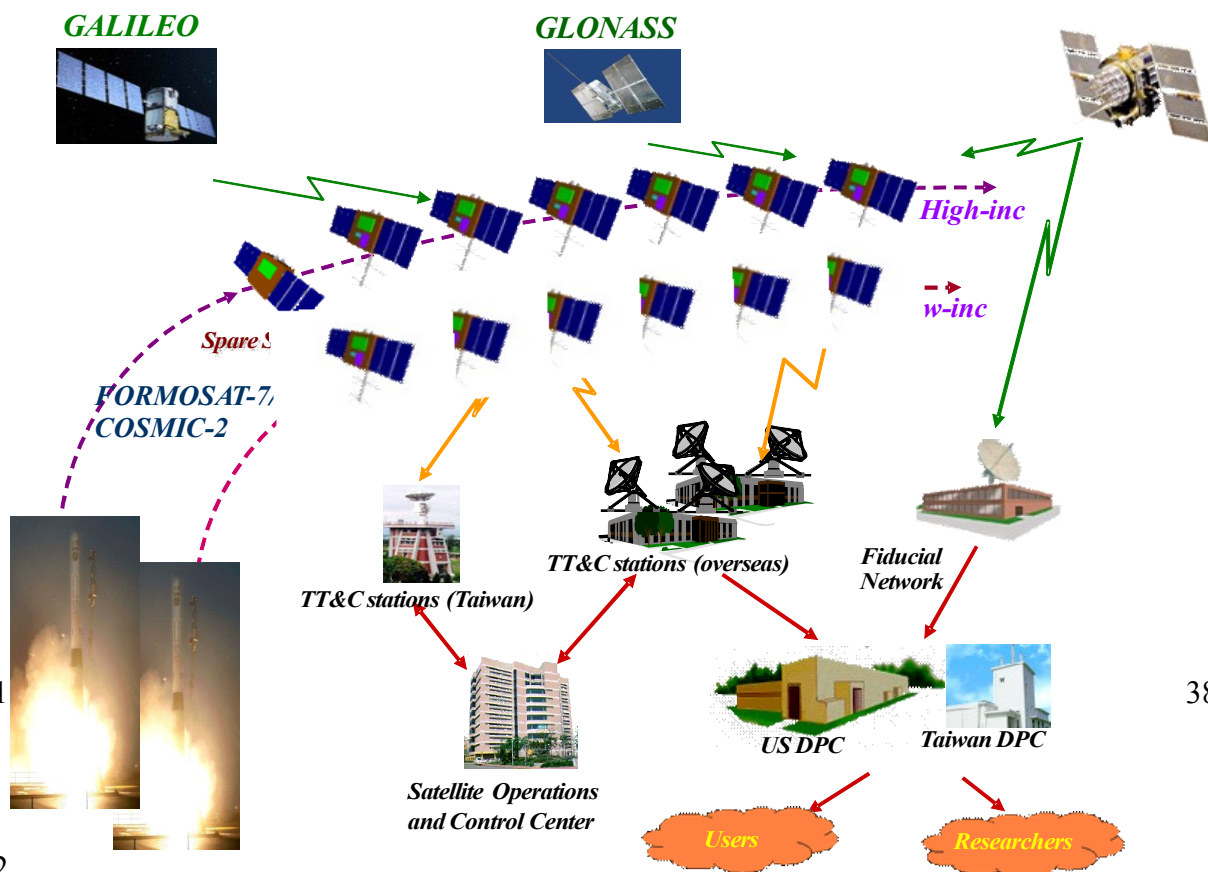

1

2

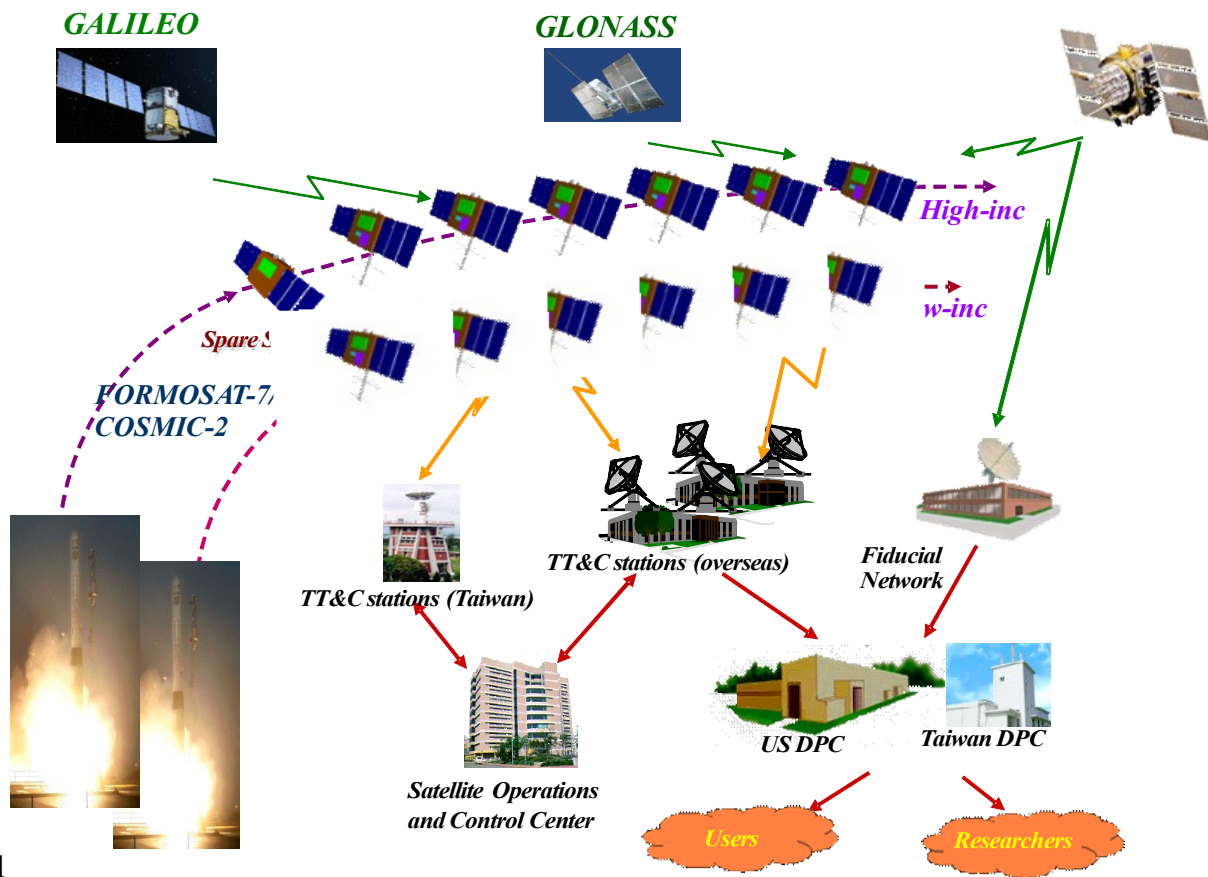

1

2

Figure 6. Proposed FS-7/C-2 Mission Architecture-

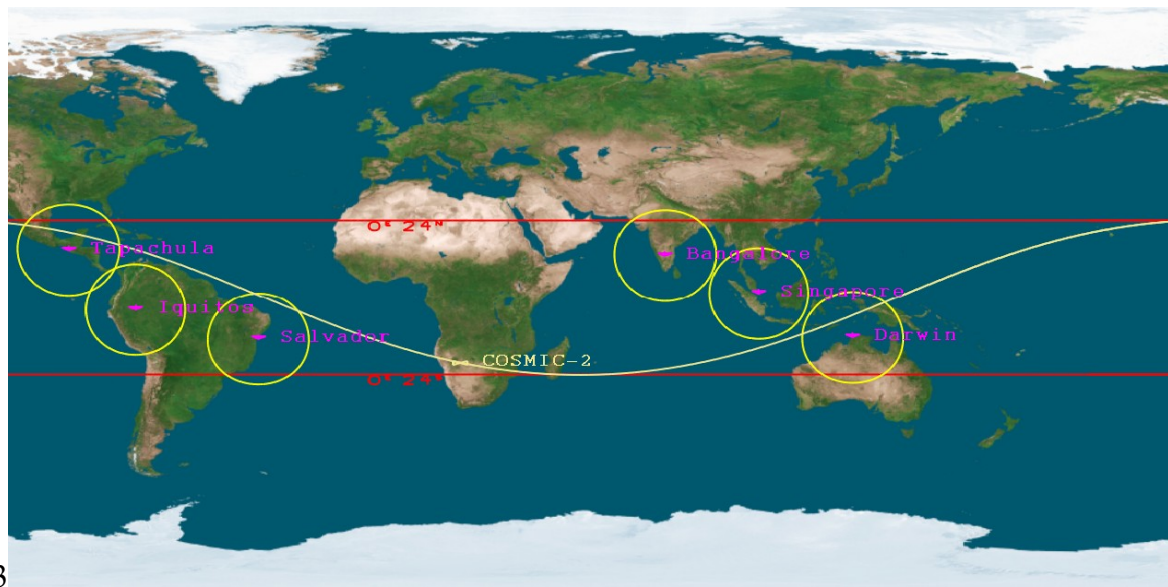

3

4

Figure 7. Potential FS-7/C-2 Equatorial Ground Station Locations-

5

1
